# Supplementary material for: A Practical Approach to Bicyclic Carbamoyl Pyridones with Application to the Synthesis of HIV-1 Integrase Strand Transfer Inhibitors
Source: MDPI journal article supplement (doi:10.3390/molecules28031428), 2023-02-02

## Index

| <b>NMR spectra of<br/>(compound number)</b> | <b>Page no.</b> |
|---------------------------------------------|-----------------|
| <b>10</b>                                   | S3              |
| <b>13</b>                                   | S4              |
| <b>14</b>                                   | S5              |
| <b>17</b>                                   | S6              |
| <b>18</b>                                   | S7              |
| <b>19</b>                                   | S8              |
| <b>20</b>                                   | S9              |
| <b>21</b>                                   | S10             |
| <b>22</b>                                   | S11             |
| <b>23</b>                                   | S12             |
| <b>24</b>                                   | S13             |

| <b>NMR spectra of<br/>(compound number)</b> | <b>Page no</b> |
|---------------------------------------------|----------------|
| <b>25</b>                                   | S14            |
| <b>26</b>                                   | S15            |
| <b>27</b>                                   | S16            |
| <b>28</b>                                   | S17            |
| <b>29</b>                                   | S18            |
| <b>30</b>                                   | S19            |
| <b>31</b>                                   | S20            |
| <b>32</b>                                   | S21            |
| <b>33</b>                                   | S22            |

<sup>1</sup>H NMR (400 MHz, CDCl<sub>3</sub>)

284A-Coupling.1.fid — PROTON CDCl<sub>3</sub> /home/JJB058/nmrdata/PSM284 PSM284 11

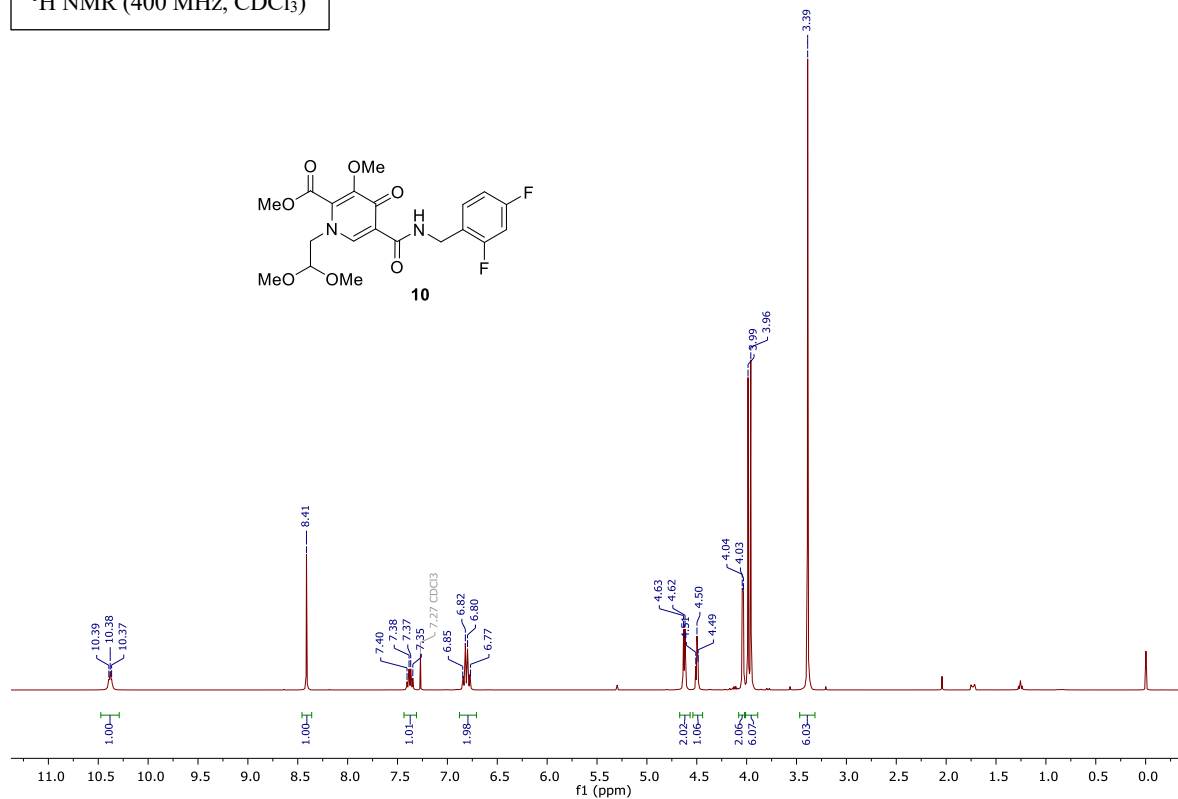

<sup>13</sup>C NMR (101 MHz, CDCl<sub>3</sub>)

284A-Coupling.2.fid — C13CPD CDCl<sub>3</sub> /home/JJB058/nmrdata/PSM284 PSM284 11

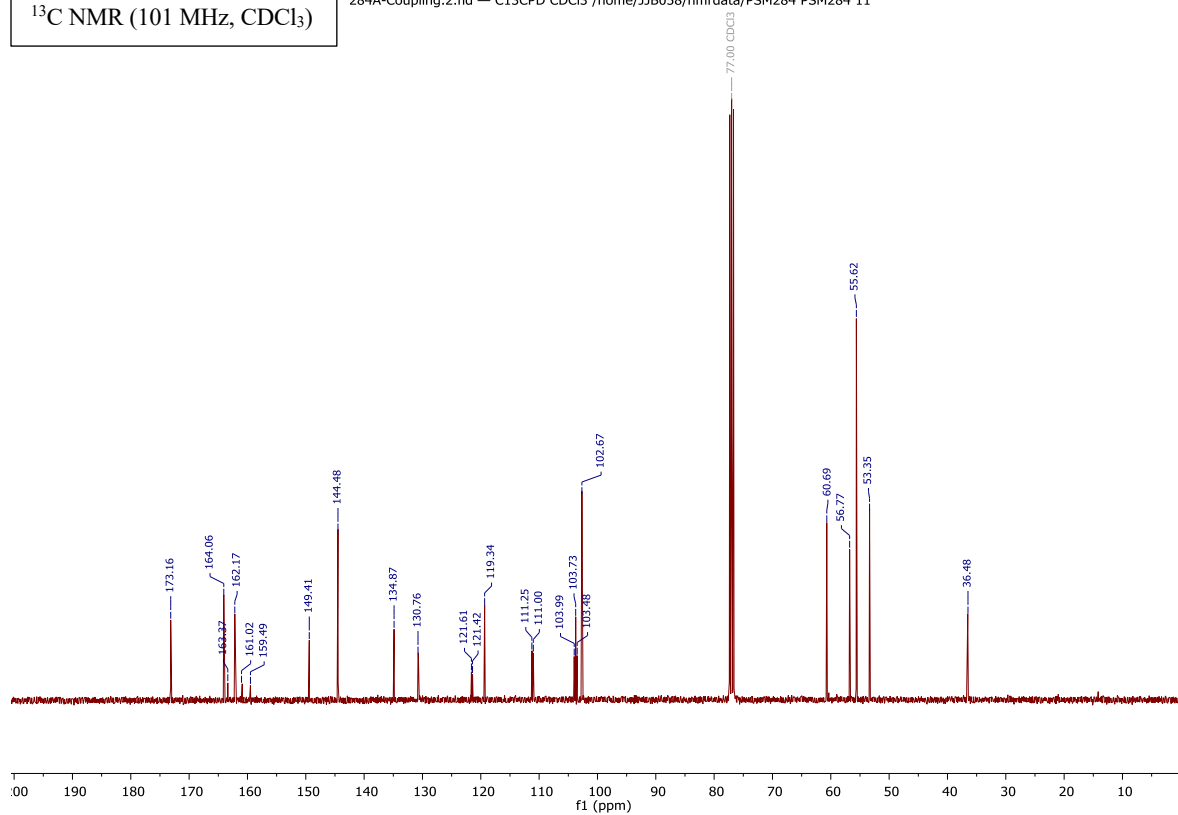

<sup>1</sup>H NMR (400 MHz, CDCl<sub>3</sub>)

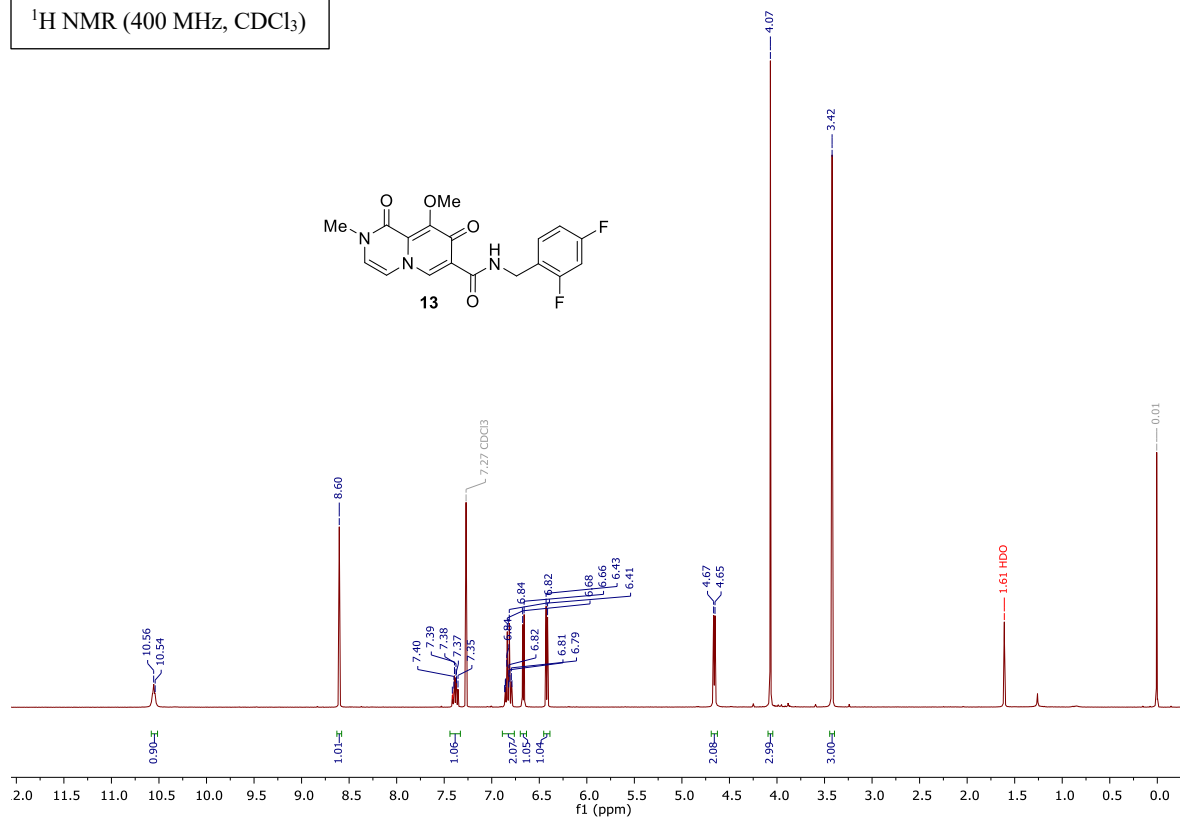

<sup>13</sup>C NMR (101 MHz, CDCl<sub>3</sub>)

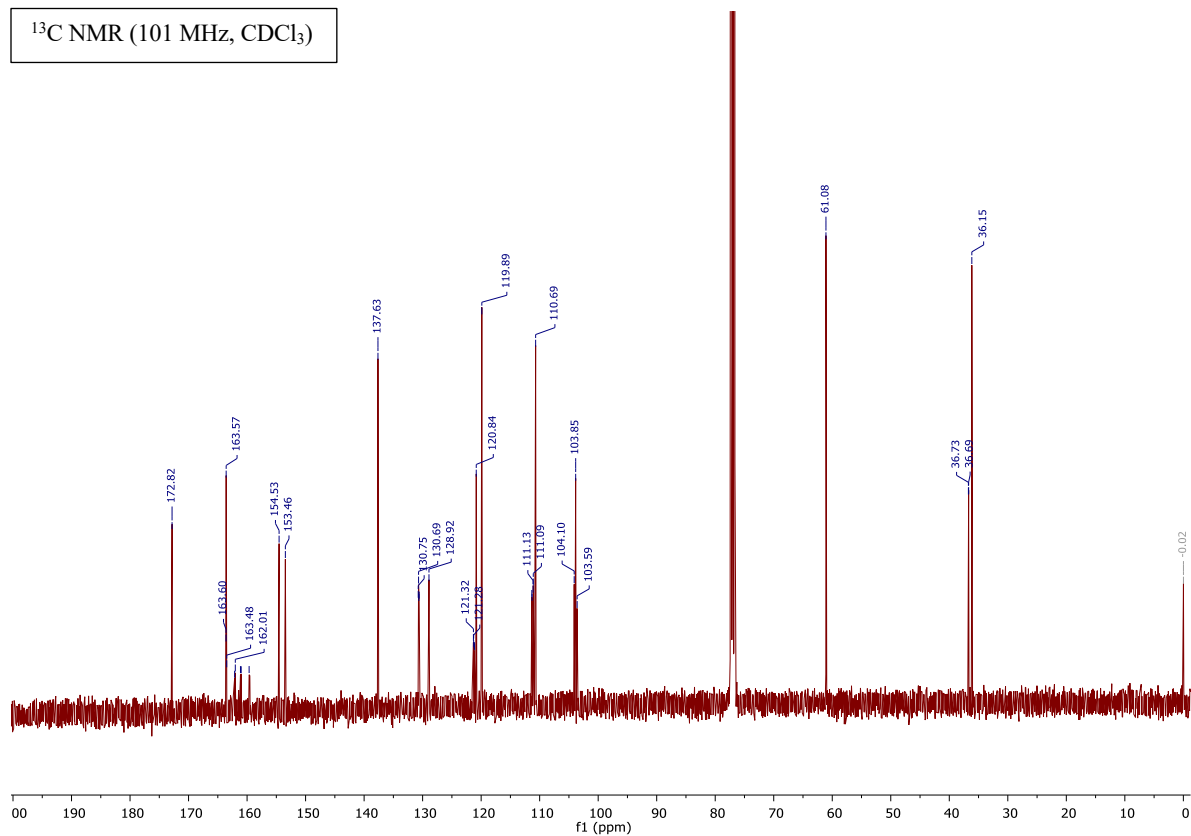

<sup>1</sup>H NMR (400 MHz, DMSO-*d*<sub>6</sub>)

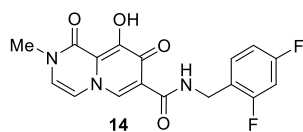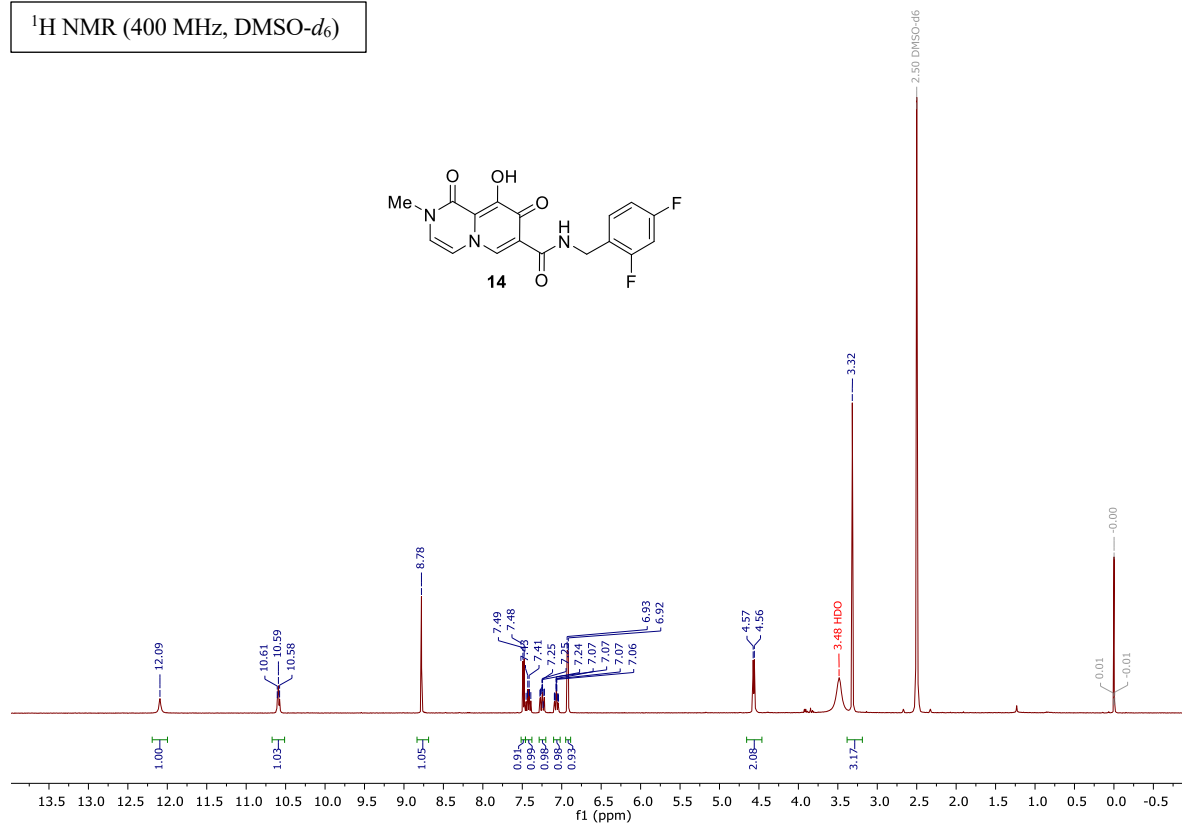

<sup>13</sup>C NMR (101 MHz, DMSO-*d*<sub>6</sub>)

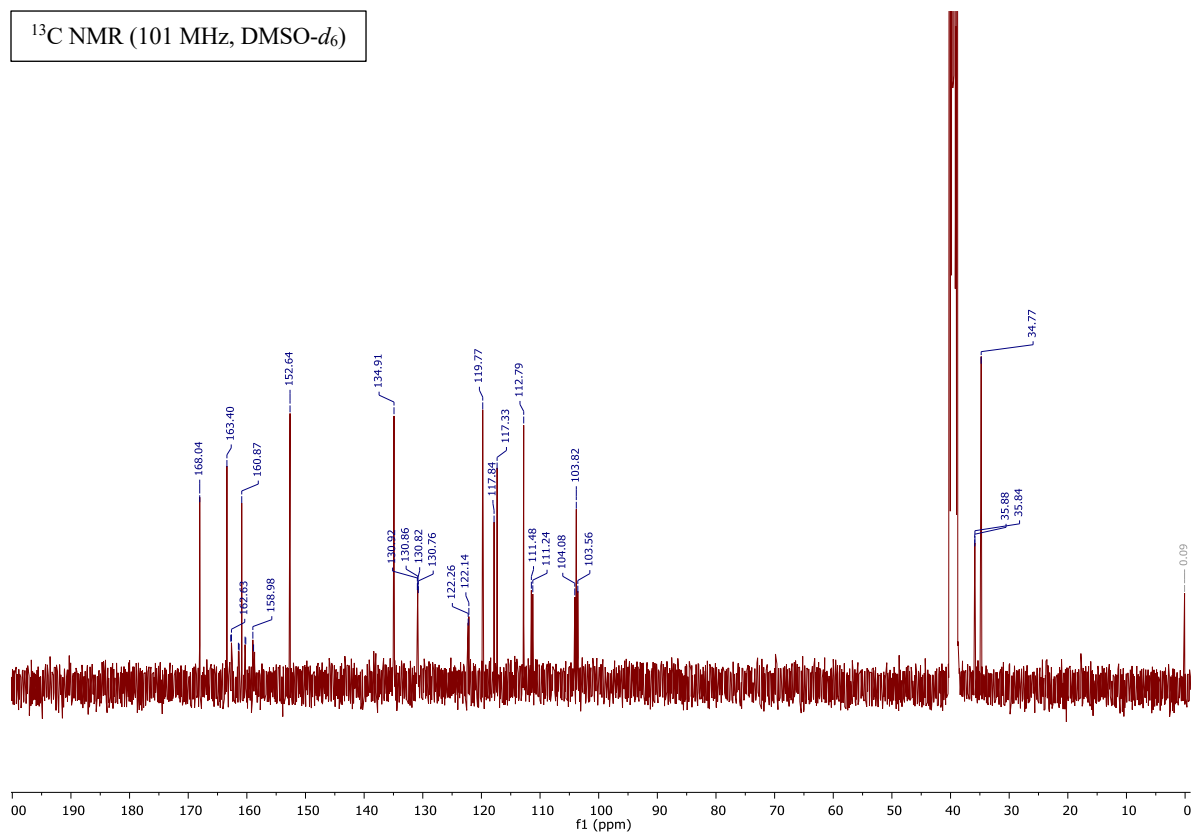

<sup>1</sup>H NMR (400 MHz, DMSO-*d*<sub>6</sub>)

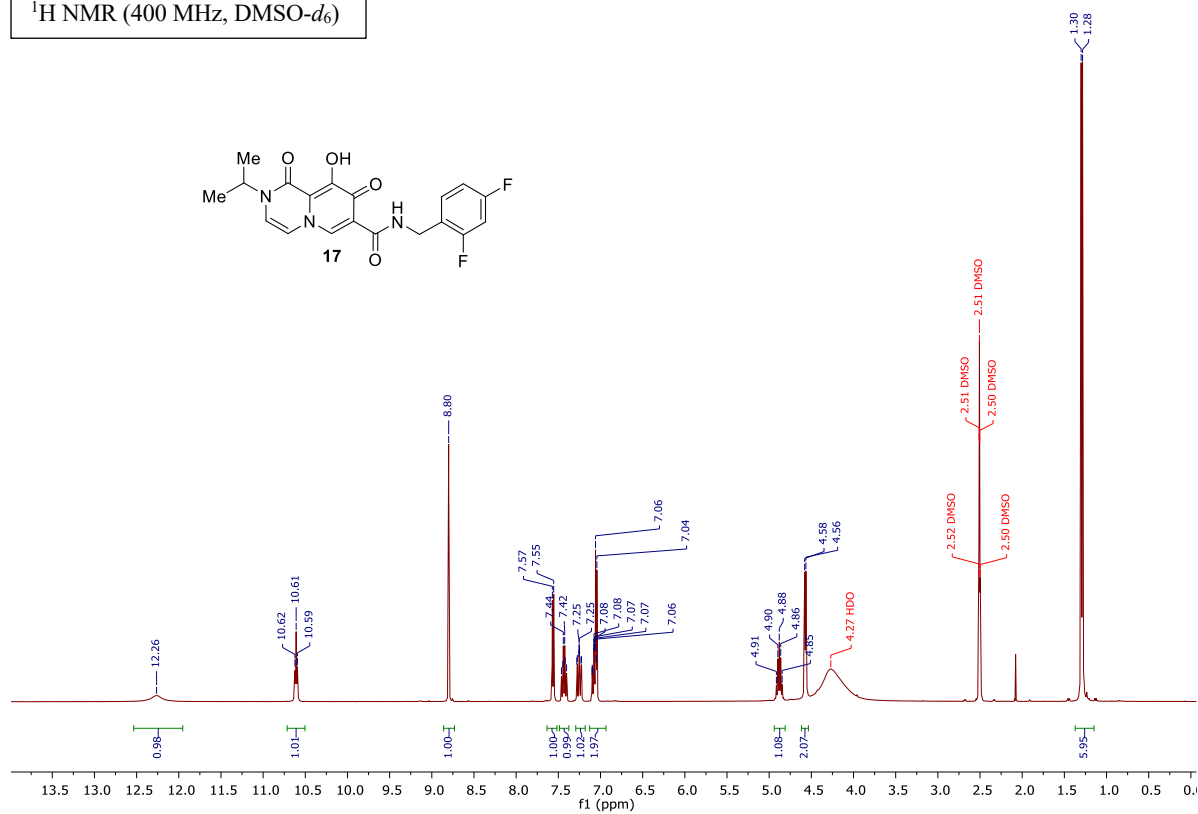

<sup>13</sup>C NMR (101 MHz, DMSO-*d*<sub>6</sub>)

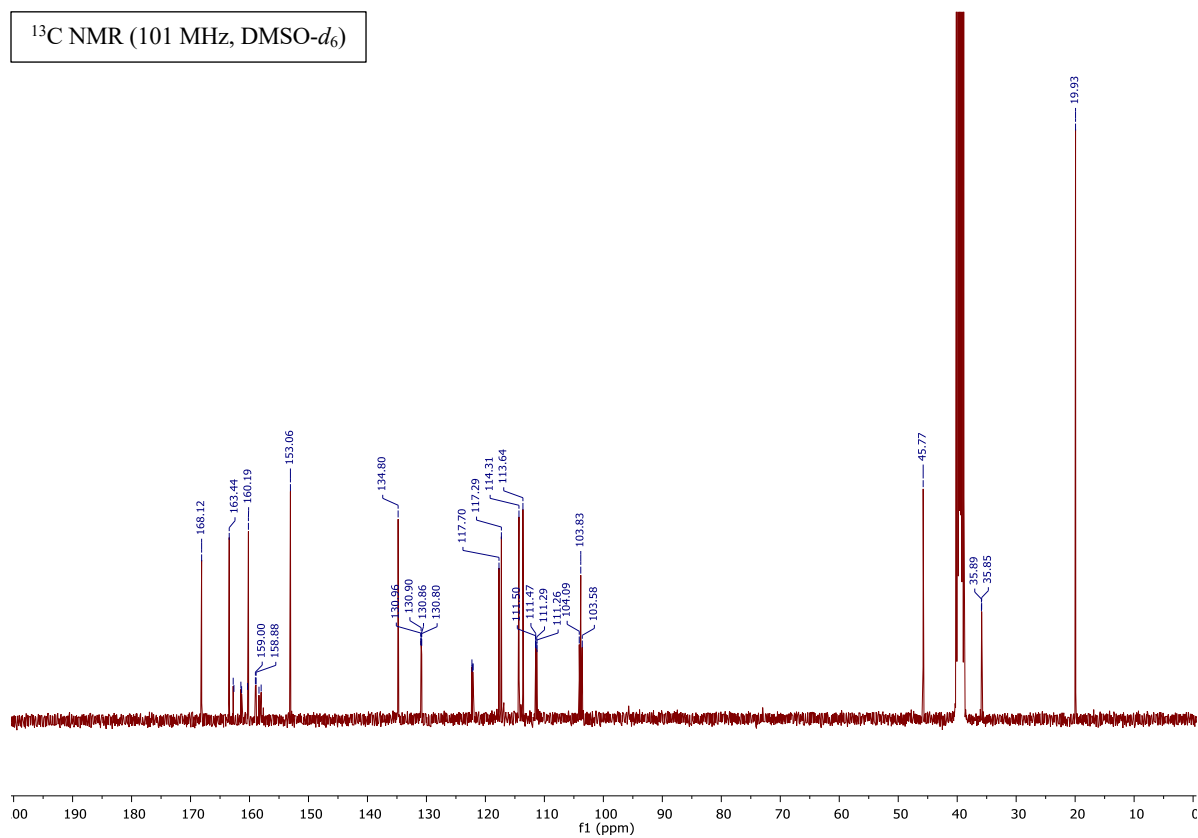

<sup>1</sup>H NMR (400 MHz, DMSO-*d*<sub>6</sub>)

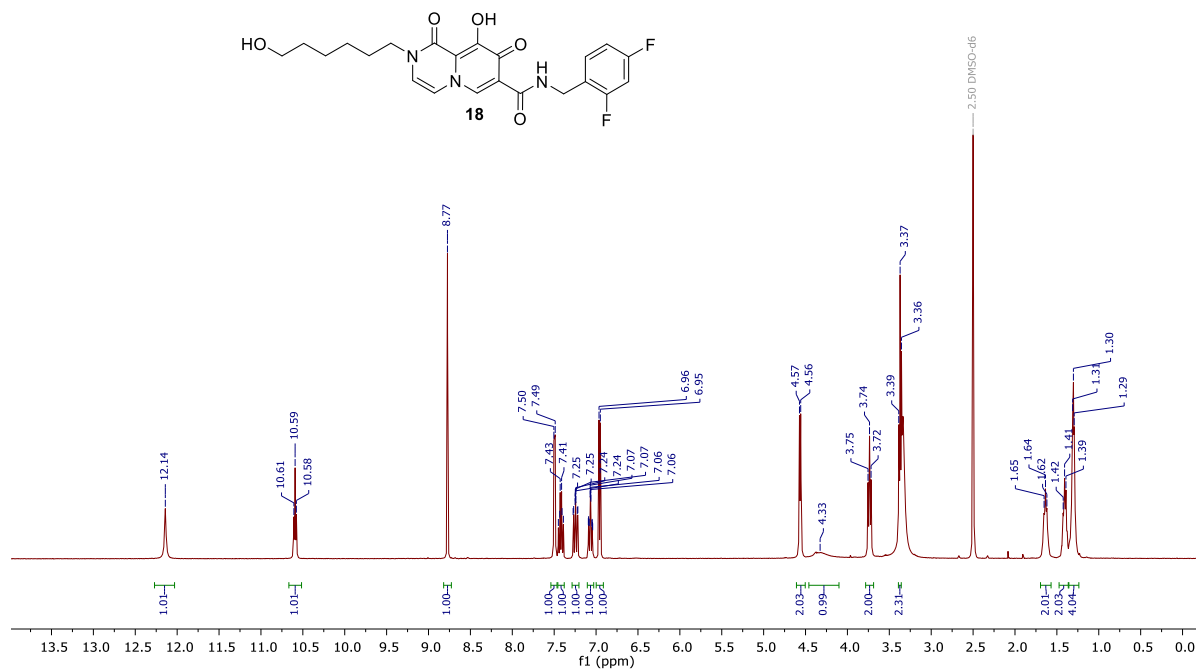

<sup>13</sup>C NMR (101 MHz, DMSO-*d*<sub>6</sub>)

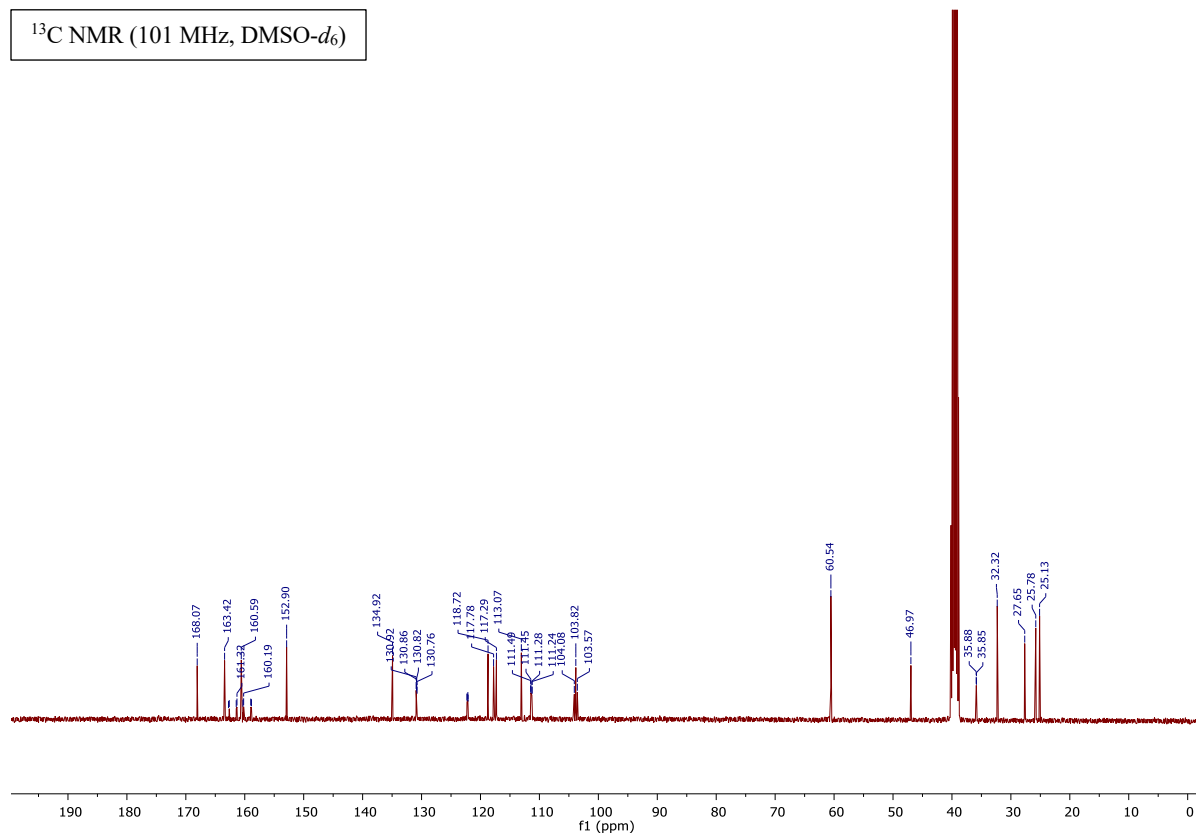

<sup>1</sup>H NMR (400 MHz, DMSO-*d*<sub>6</sub>)

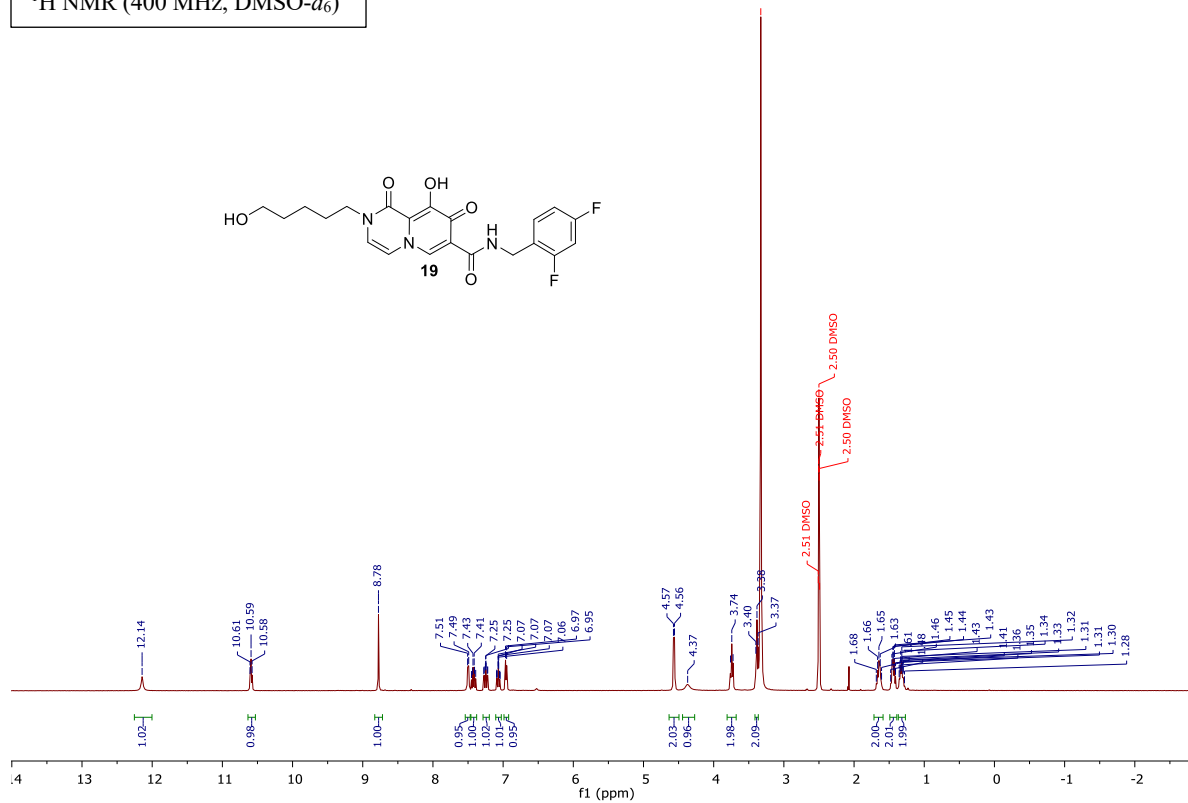

<sup>13</sup>C NMR (101 MHz, DMSO-*d*<sub>6</sub>)

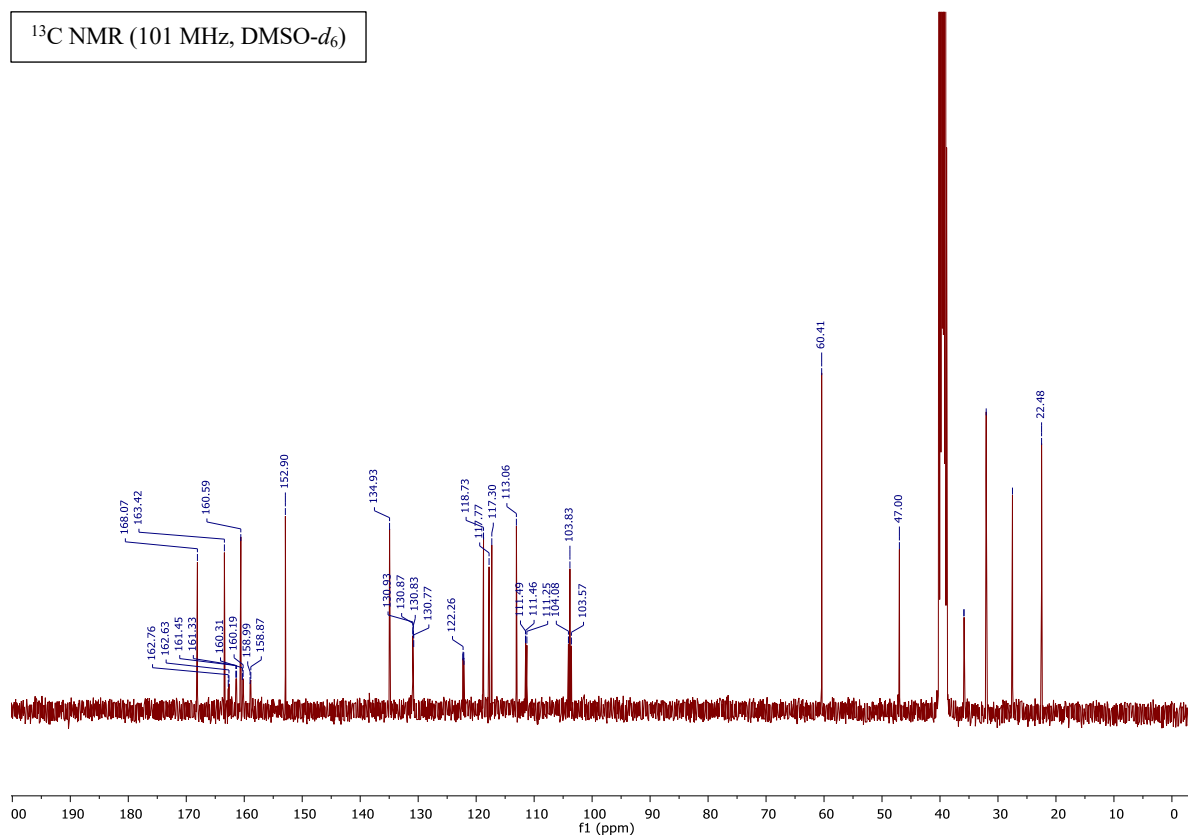

<sup>1</sup>H NMR (400 MHz, DMSO-*d*<sub>6</sub>)

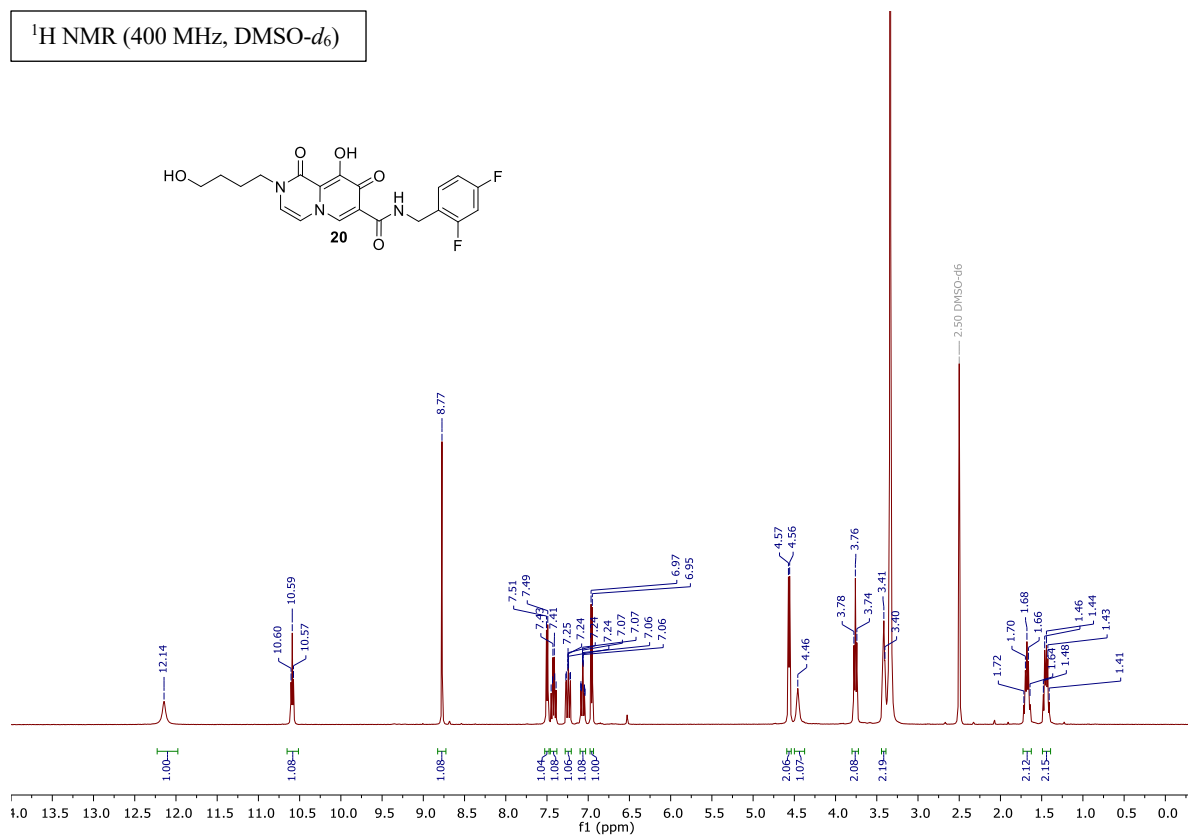

<sup>13</sup>C NMR (101 MHz, DMSO-*d*<sub>6</sub>)

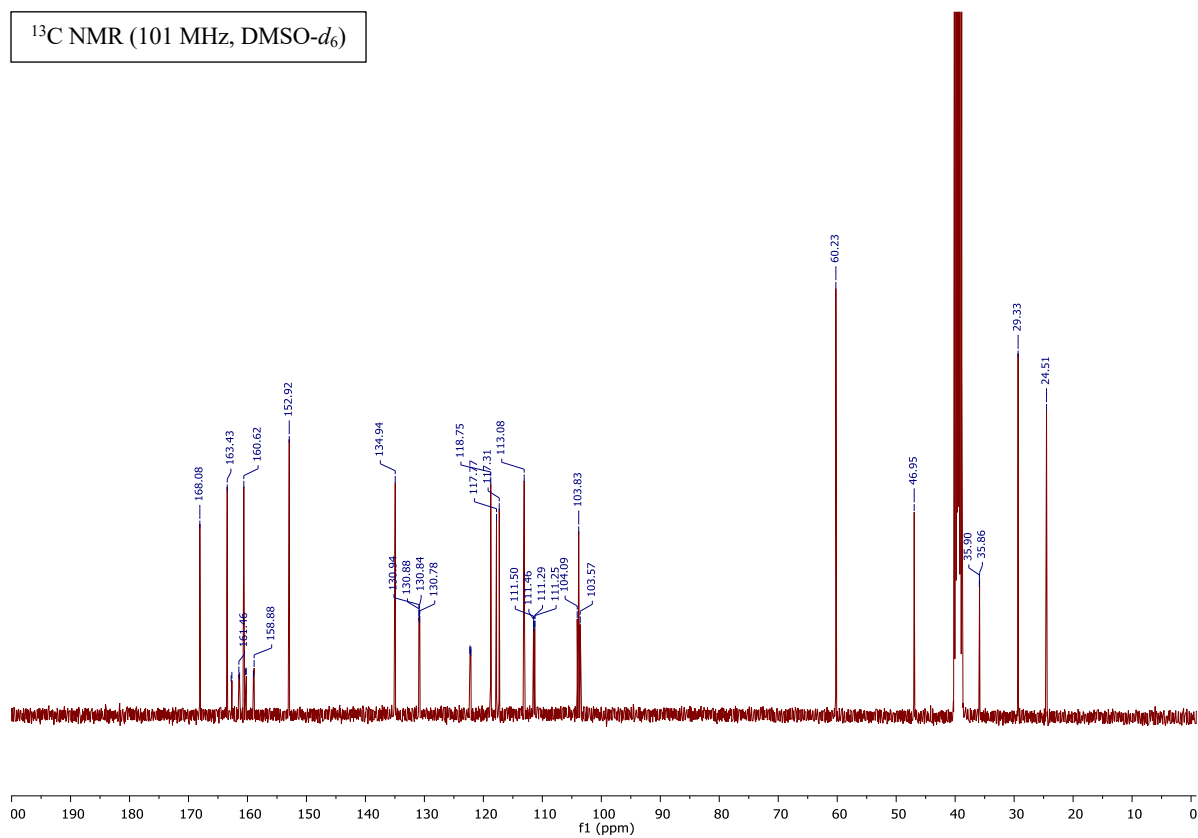



<sup>1</sup>H NMR (400 MHz, DMSO-*d*<sub>6</sub>)

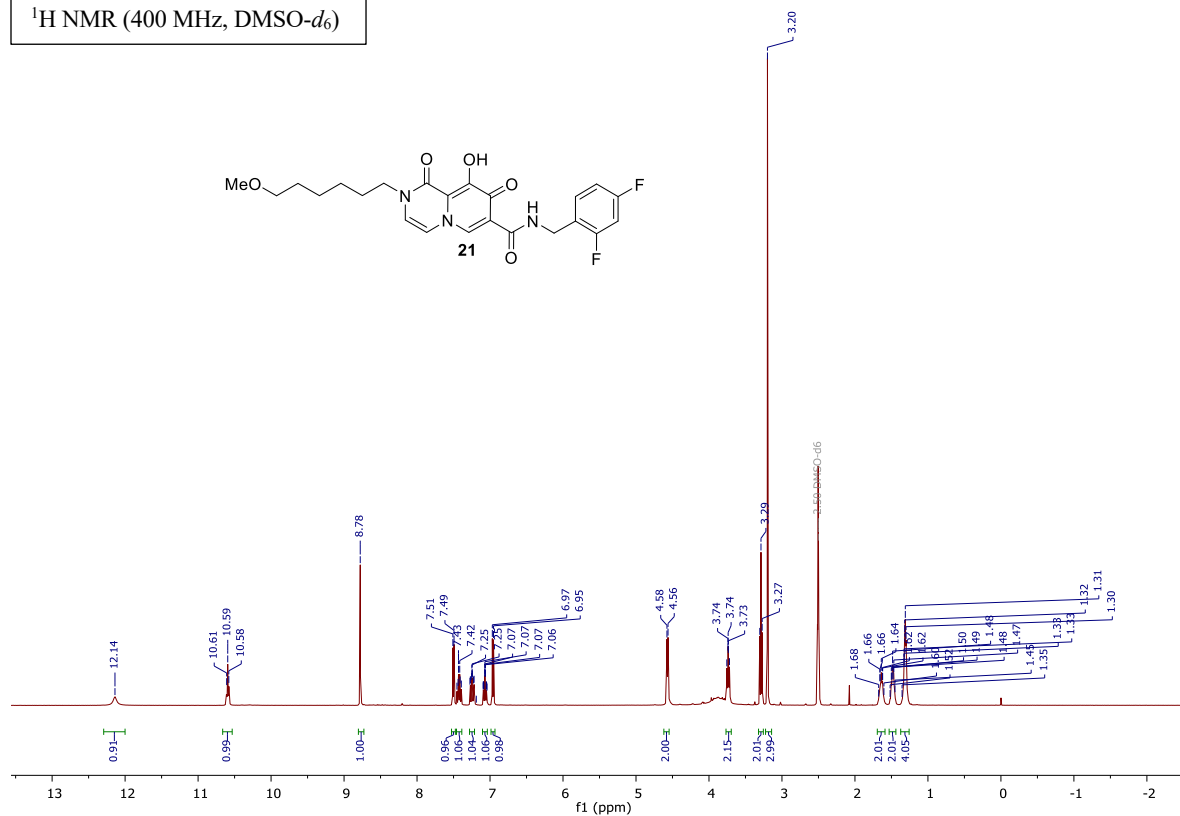

<sup>13</sup>C NMR (101 MHz, DMSO-*d*<sub>6</sub>)

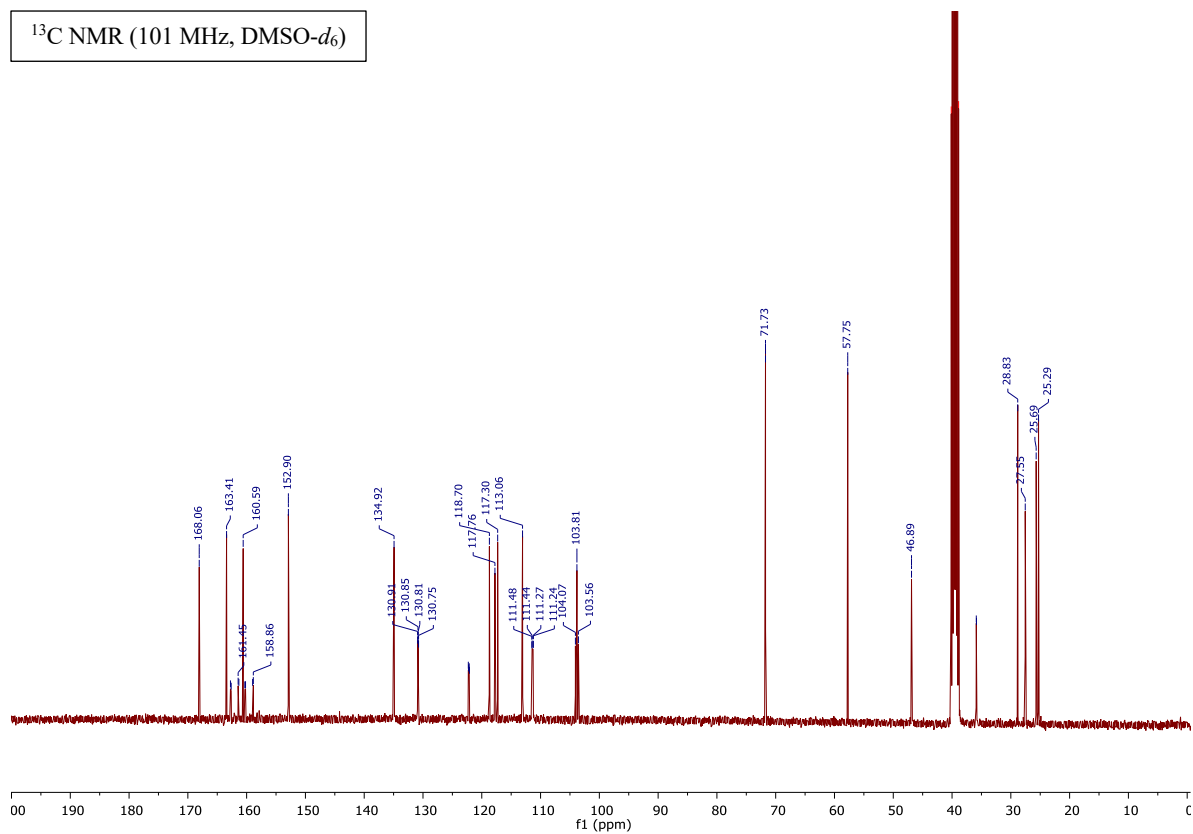

<sup>1</sup>H NMR (400 MHz, DMSO-*d*<sub>6</sub>)

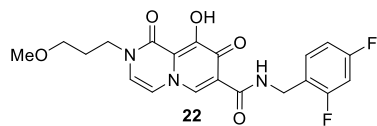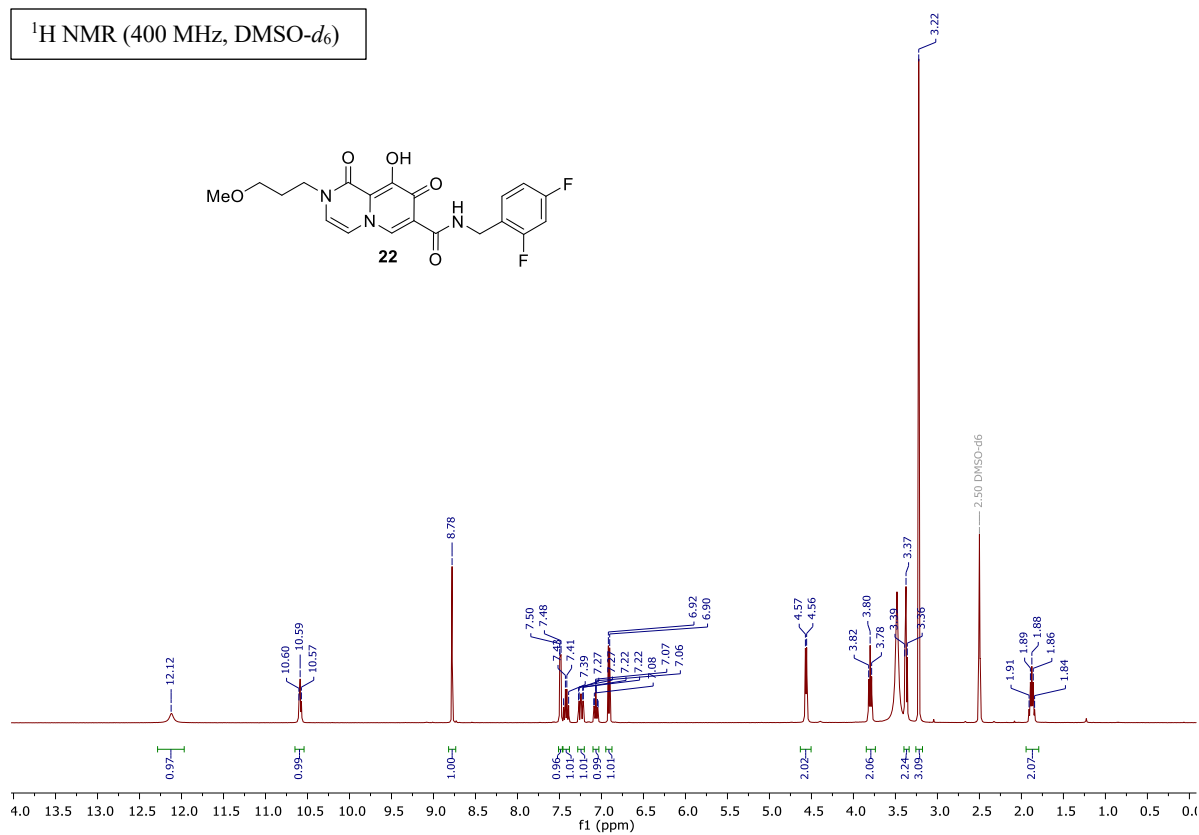

<sup>13</sup>C NMR (101 MHz, DMSO-*d*<sub>6</sub>)

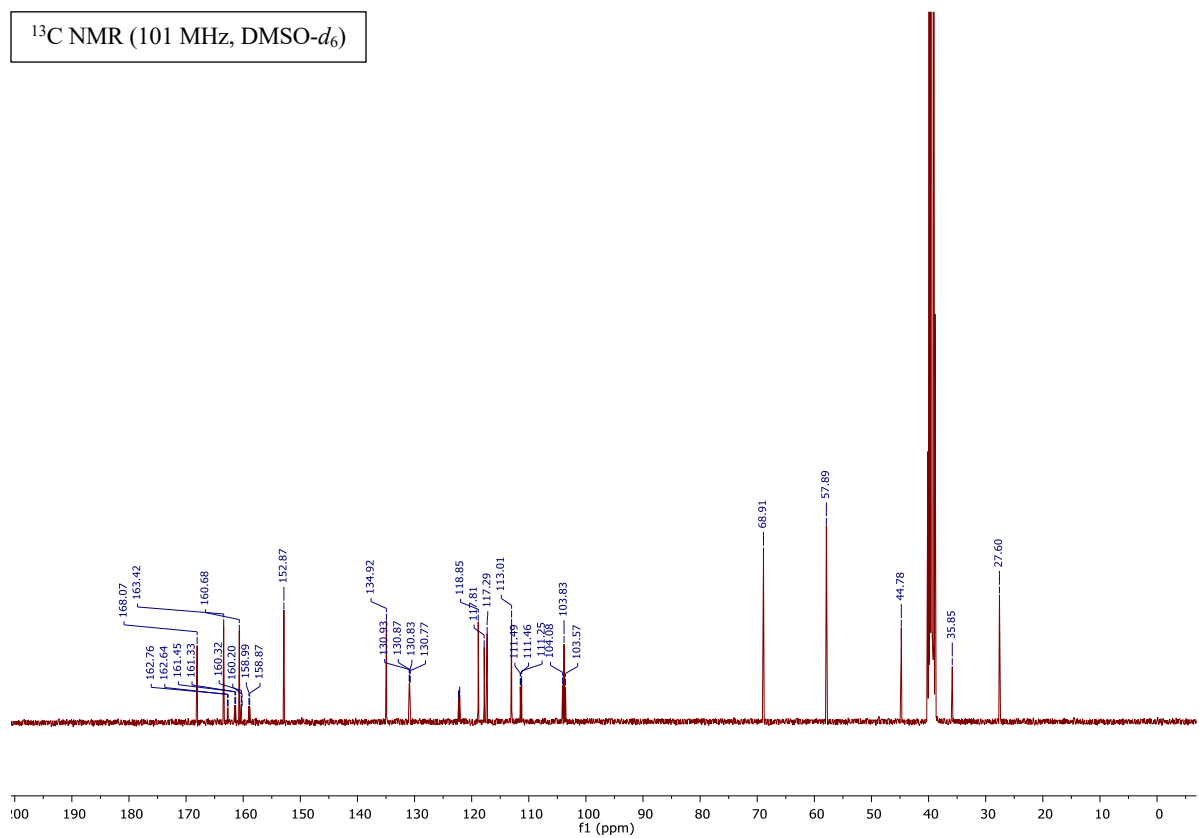

<sup>1</sup>H NMR (400 MHz, DMSO-*d*<sub>6</sub>)

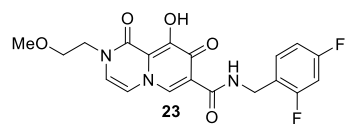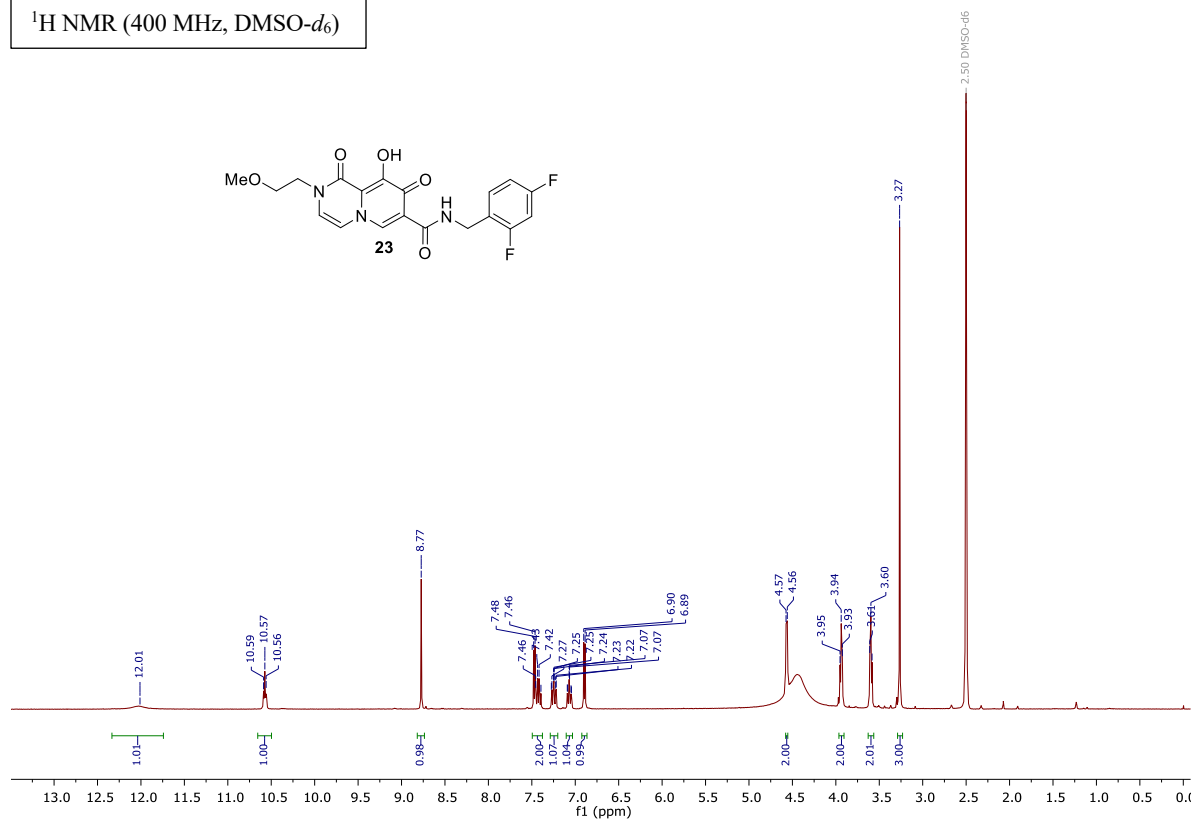

<sup>13</sup>C NMR (101 MHz, DMSO-*d*<sub>6</sub>)

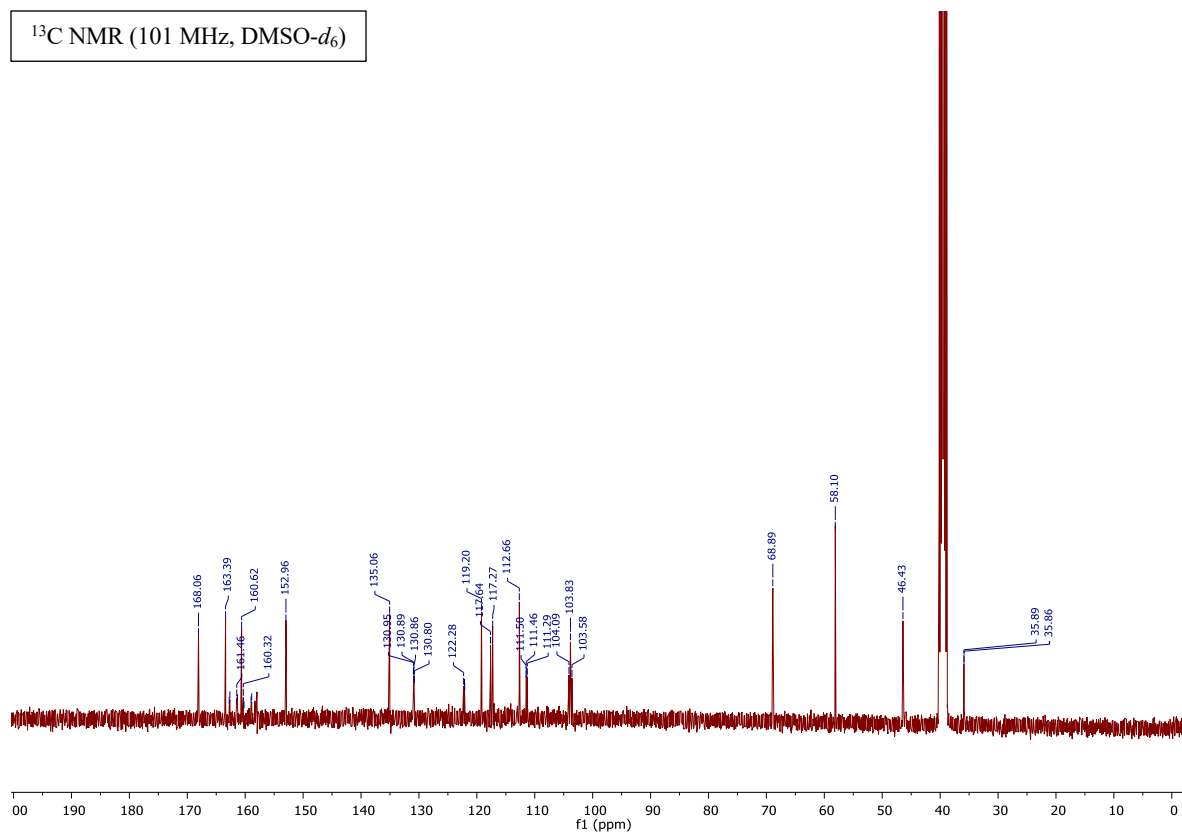

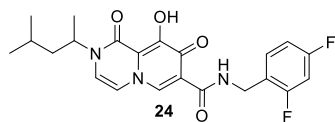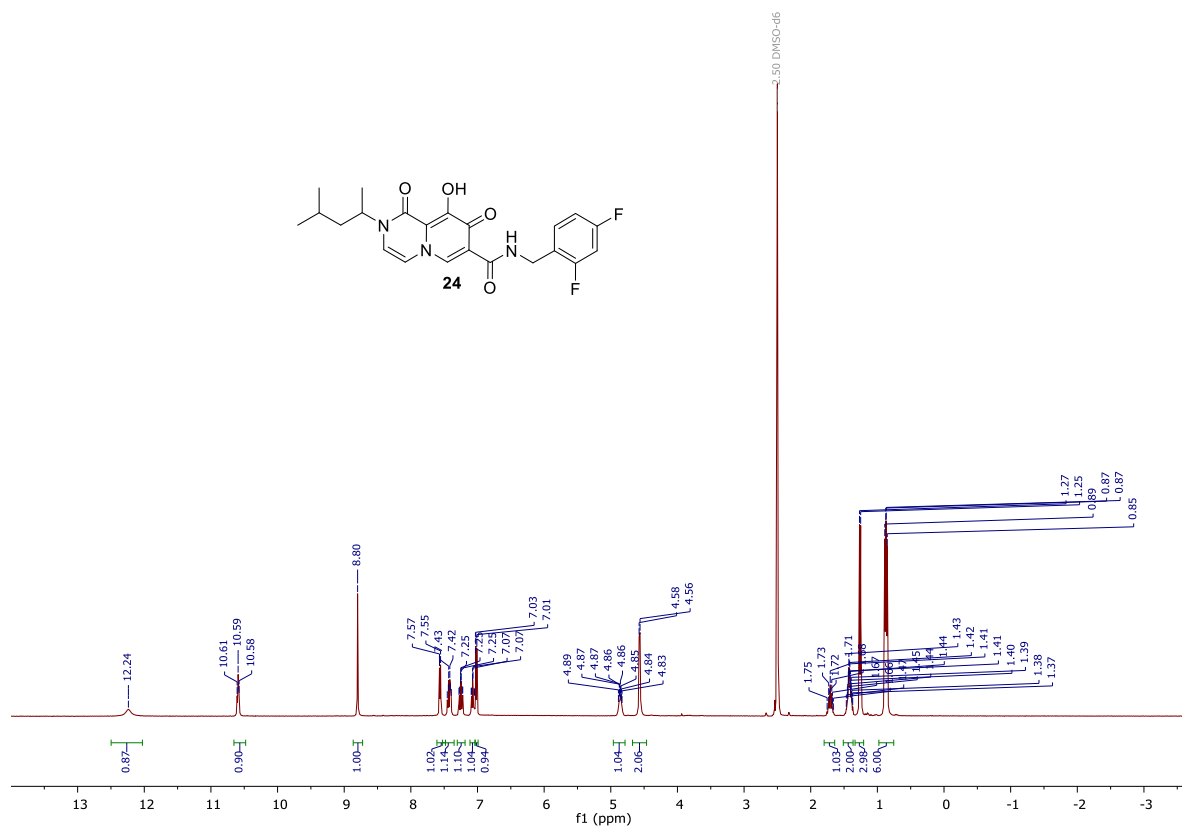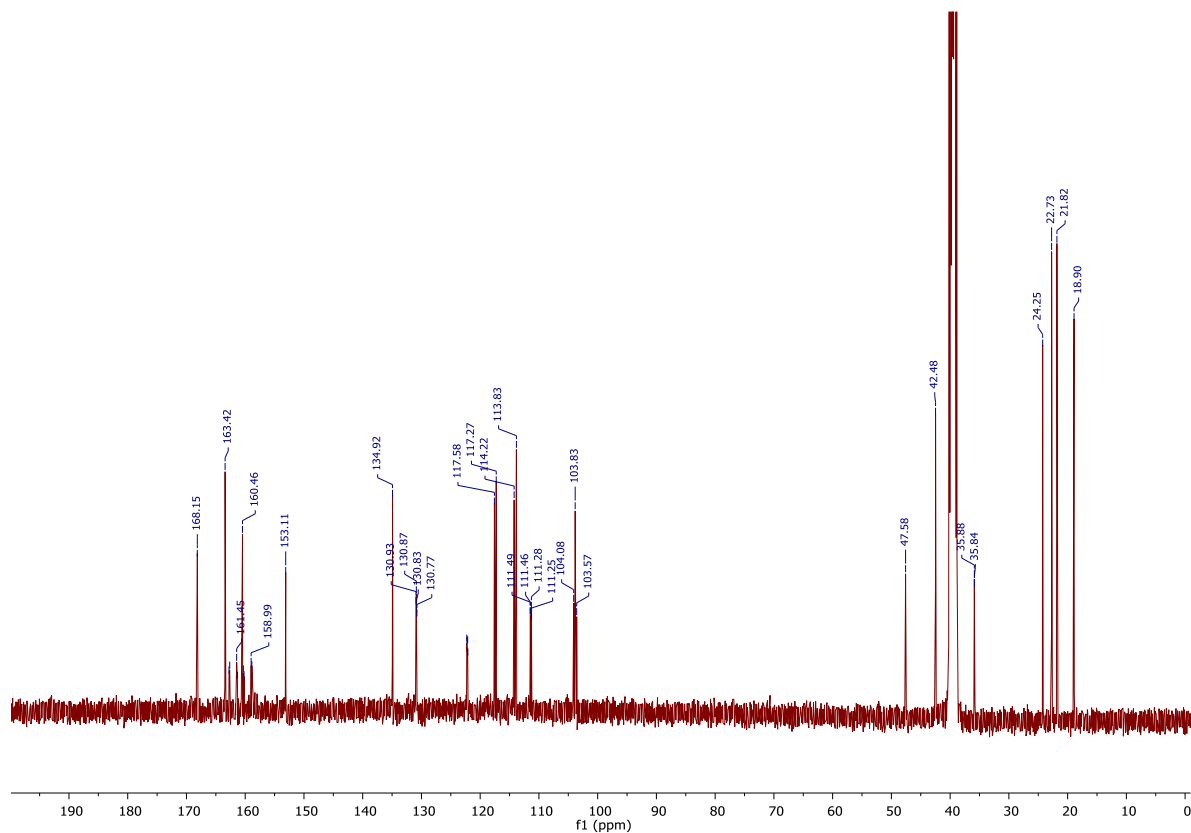

<sup>1</sup>H NMR (400 MHz, DMSO-*d*<sub>6</sub>)

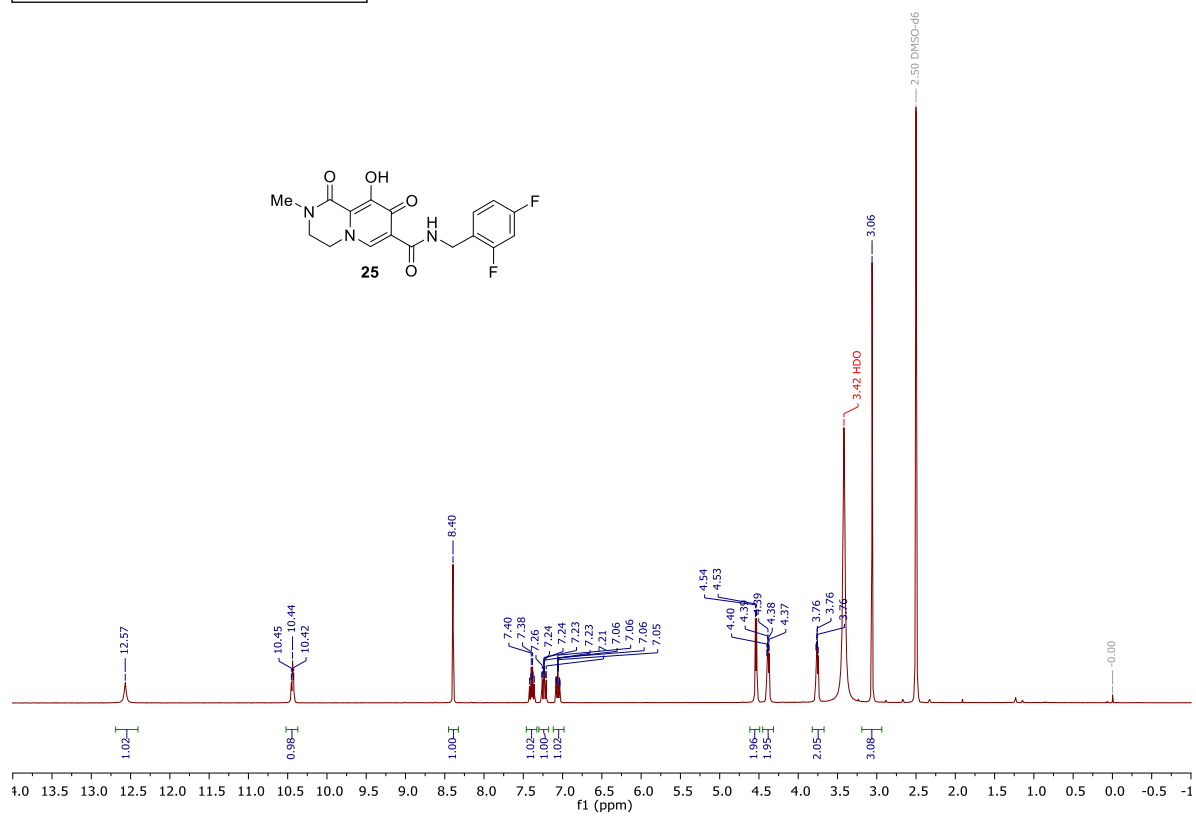

<sup>13</sup>C NMR (101 MHz, DMSO-*d*<sub>6</sub>)

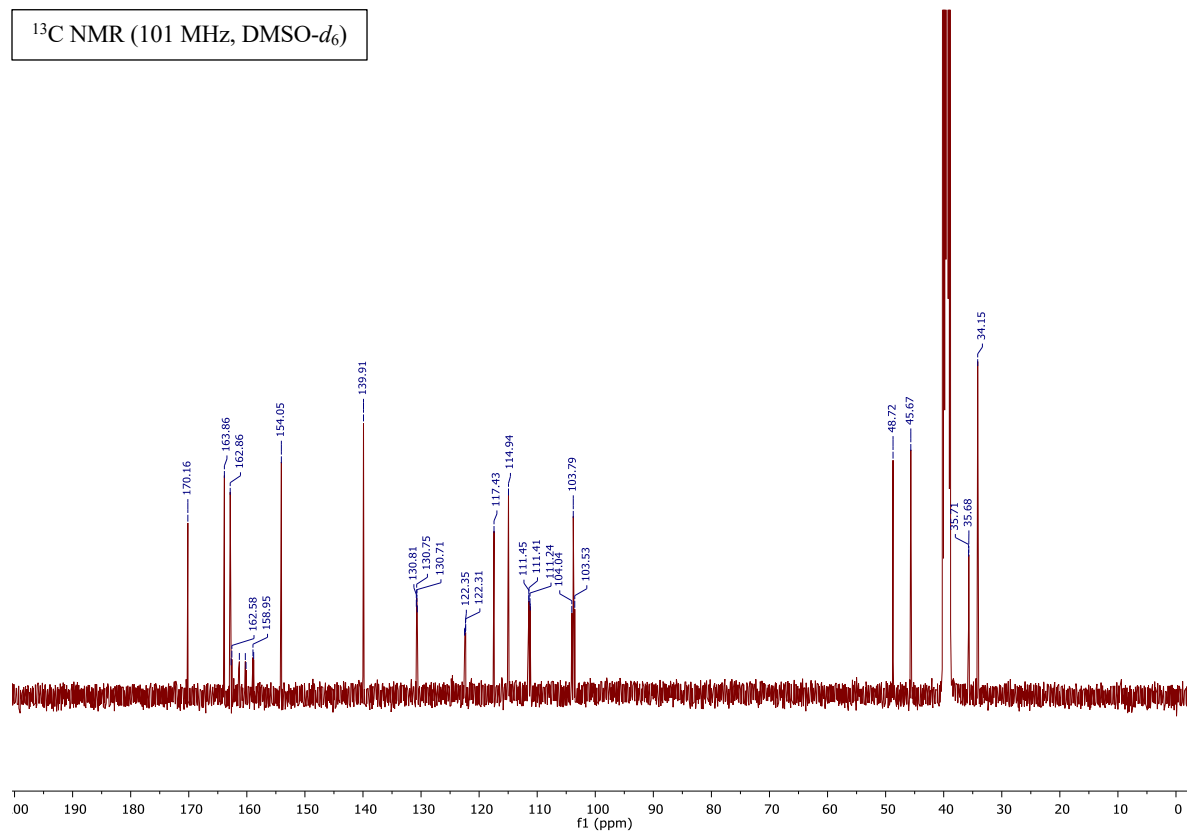

<sup>1</sup>H NMR (400 MHz, DMSO-*d*<sub>6</sub>)

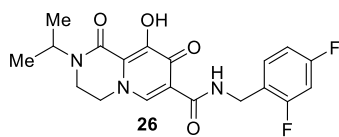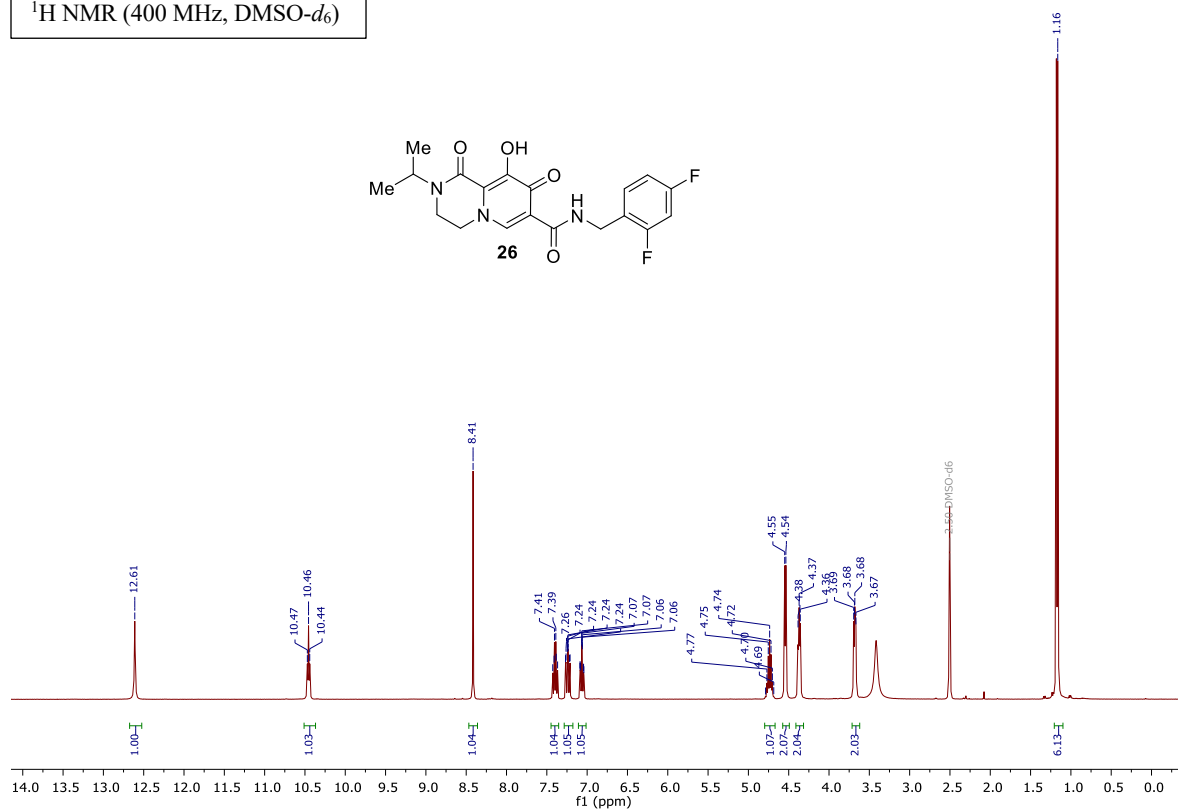

<sup>13</sup>C NMR (101 MHz, DMSO-*d*<sub>6</sub>)

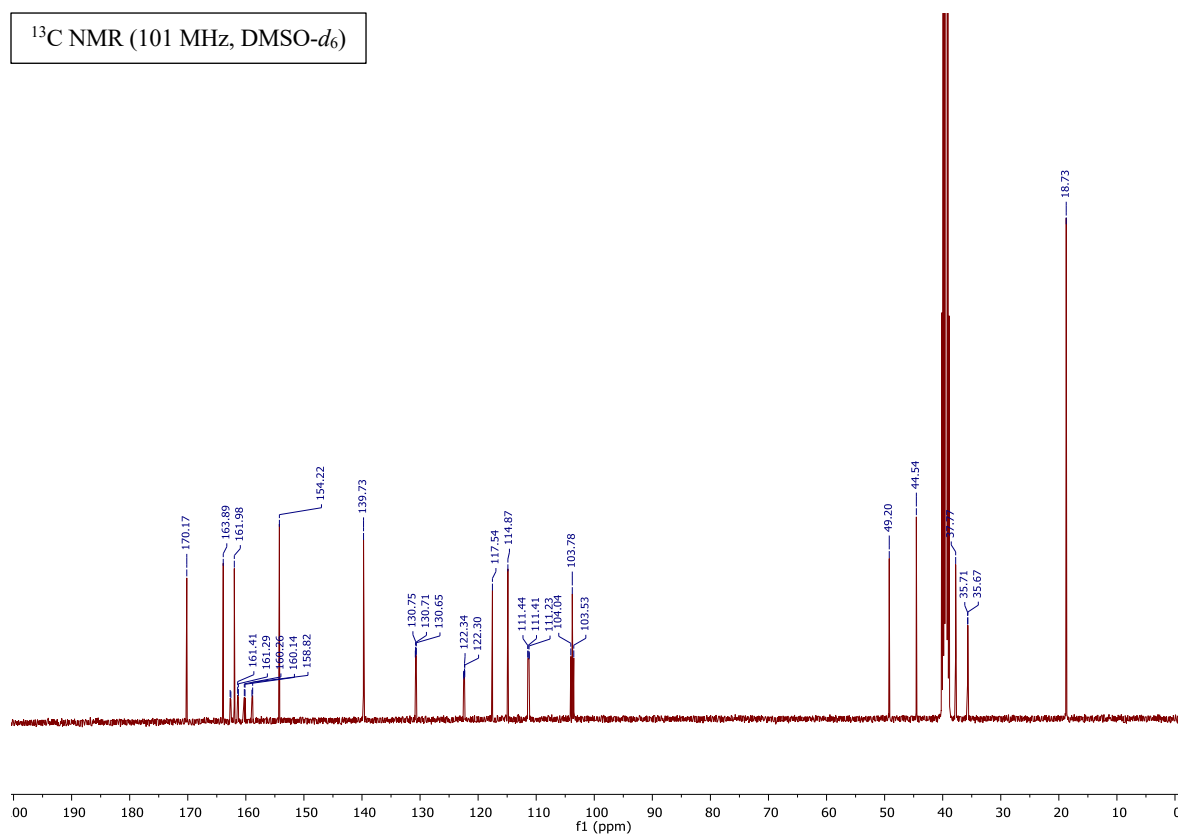

<sup>1</sup>H NMR (400 MHz, DMSO-*d*<sub>6</sub>)

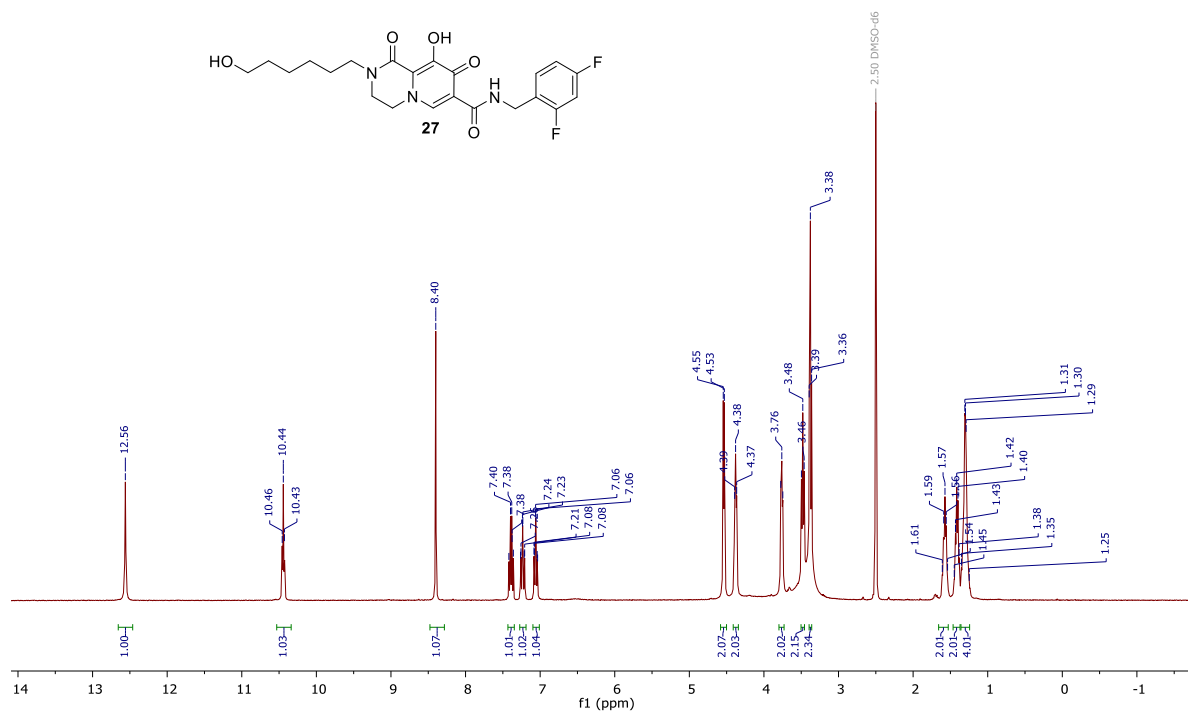

<sup>13</sup>C NMR (101 MHz, DMSO-*d*<sub>6</sub>)

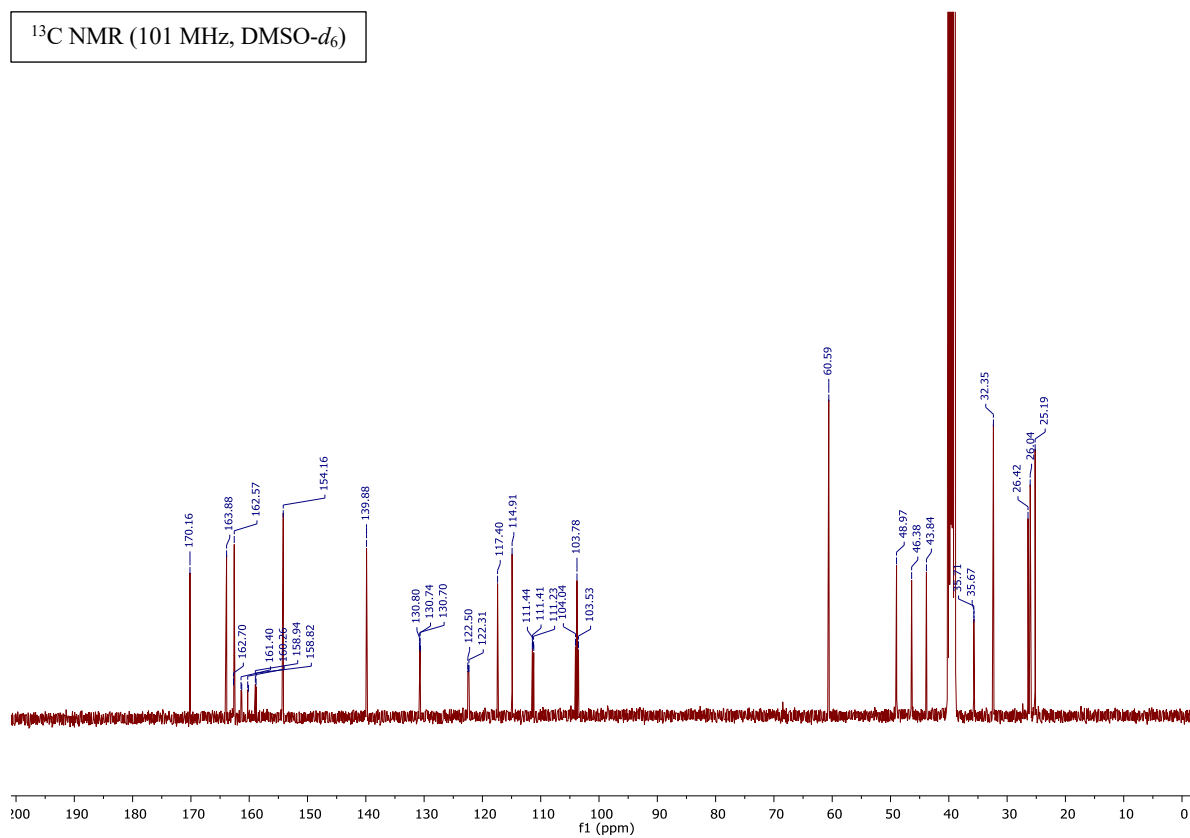

<sup>1</sup>H NMR (400 MHz, DMSO-*d*<sub>6</sub>)

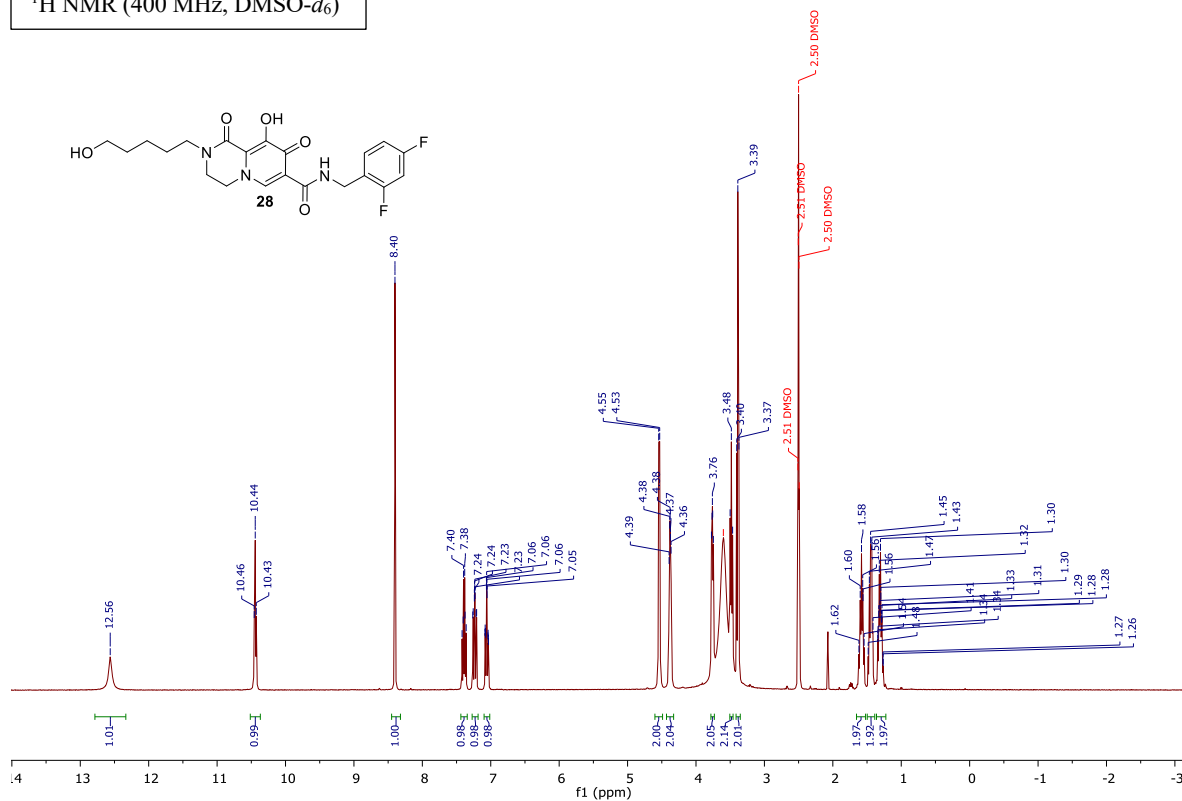

<sup>13</sup>C NMR (101 MHz, DMSO-*d*<sub>6</sub>)

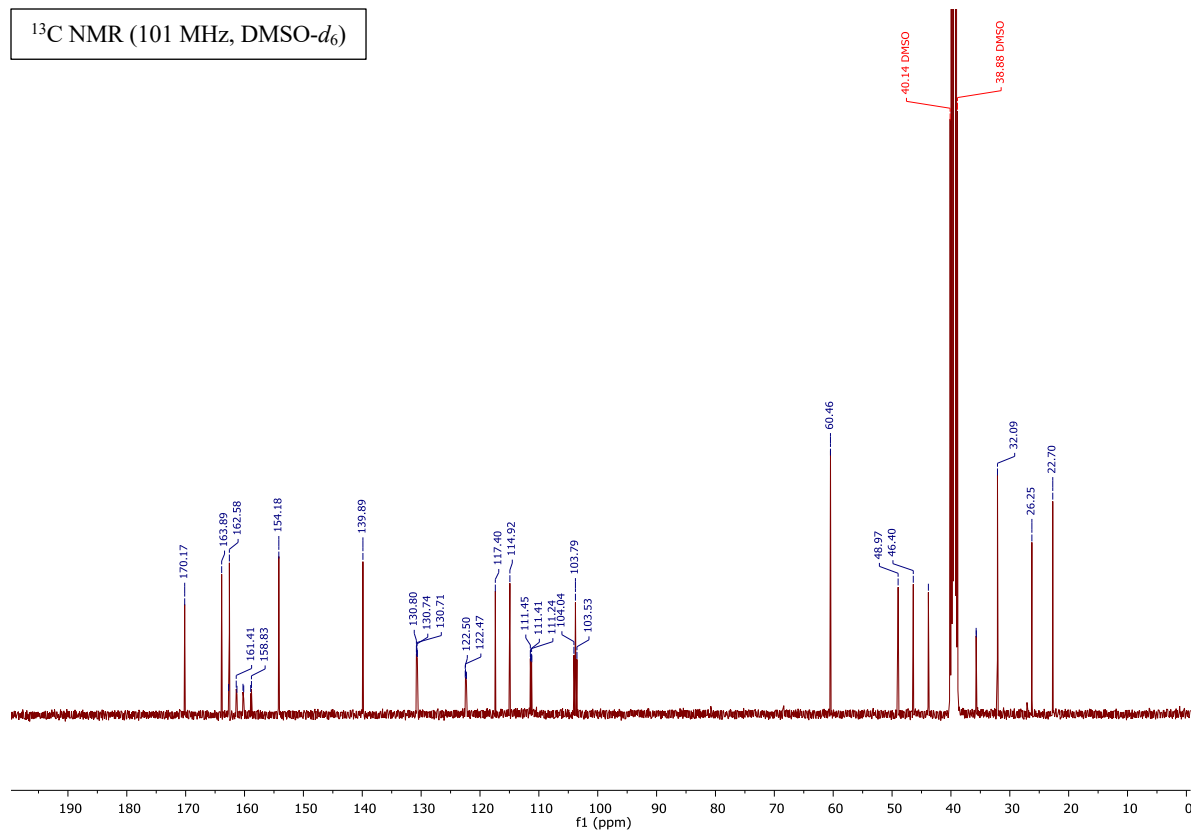



<sup>1</sup>H NMR (400 MHz, DMSO-*d*<sub>6</sub>)

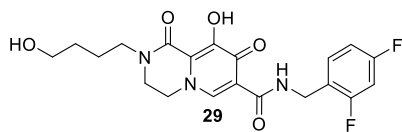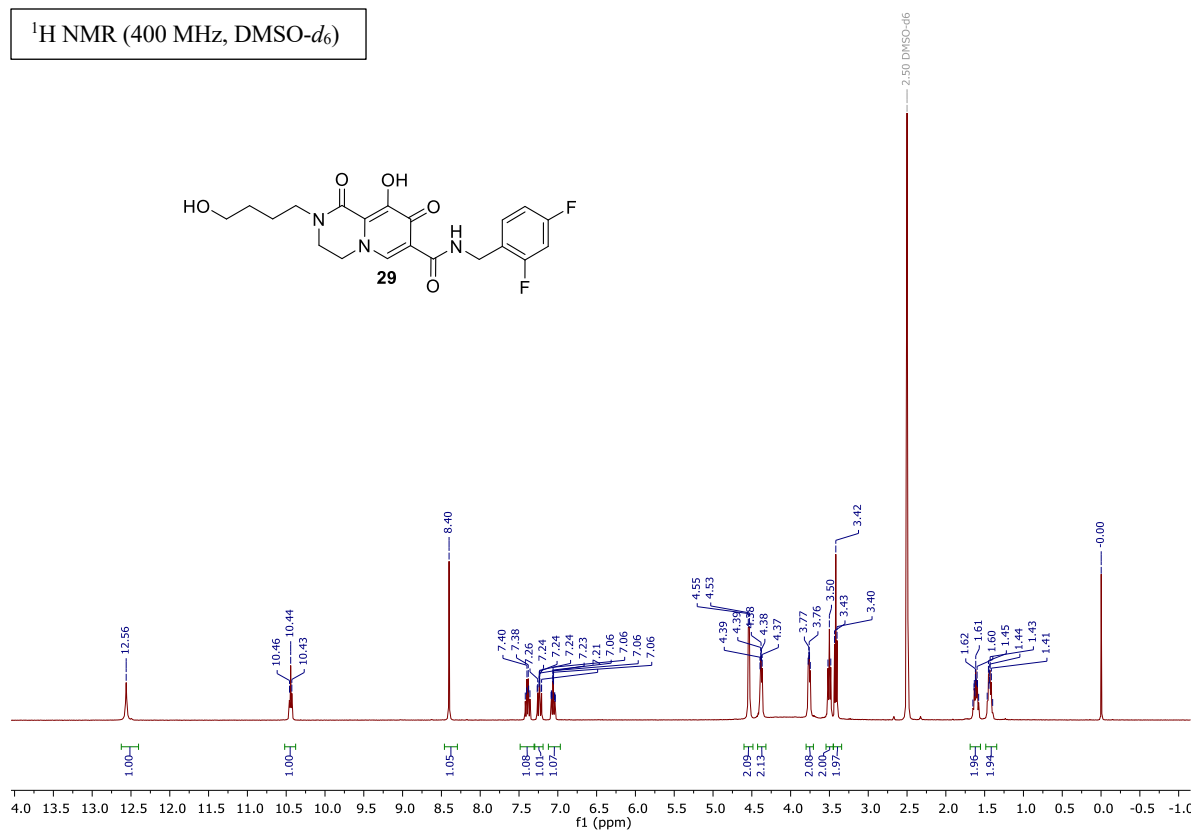

<sup>13</sup>C NMR (101 MHz, DMSO-*d*<sub>6</sub>)

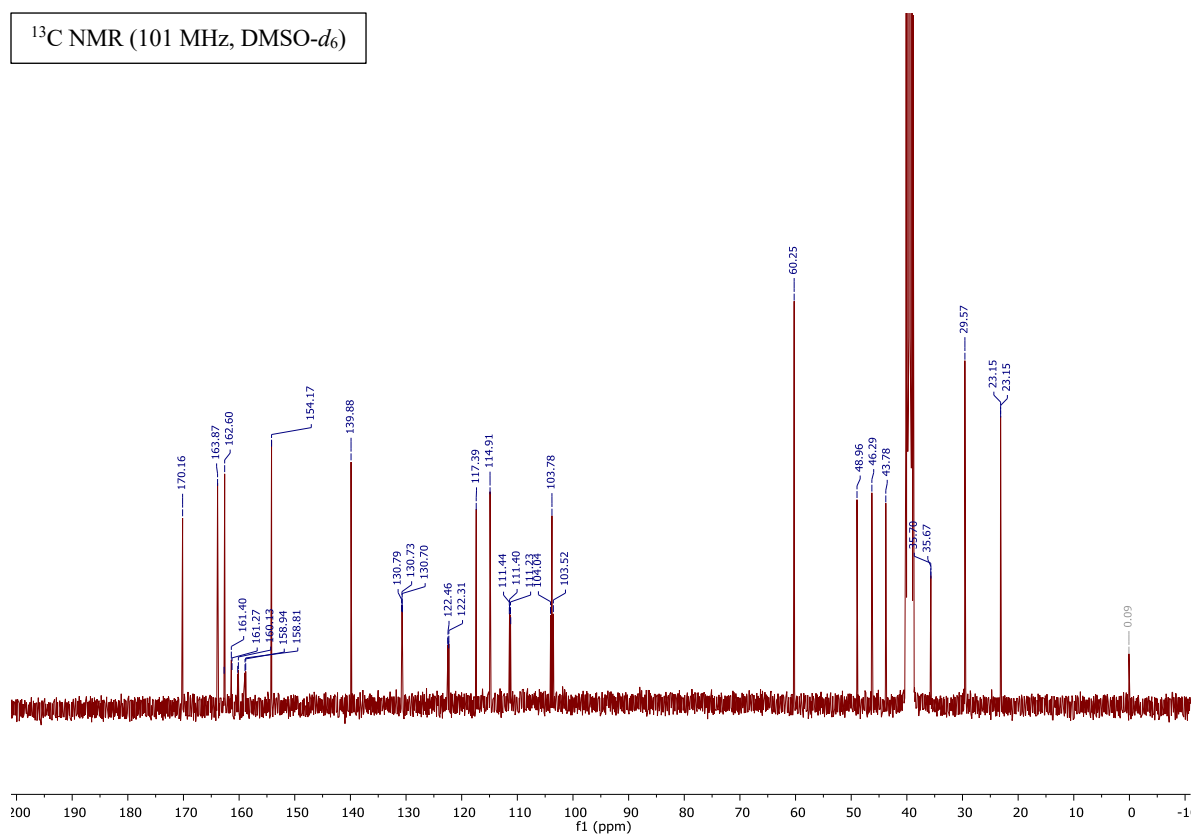

<sup>1</sup>H NMR (400 MHz, DMSO-*d*<sub>6</sub>)

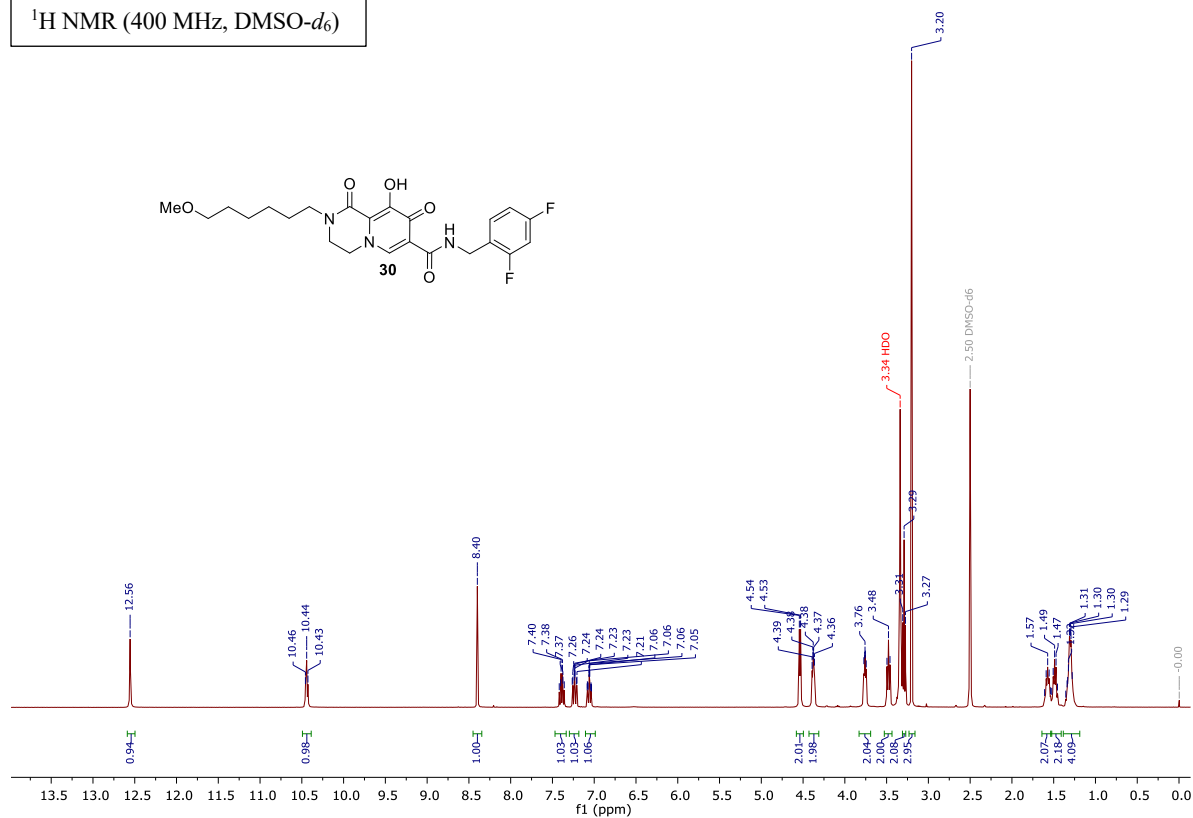

<sup>13</sup>C NMR (101 MHz, DMSO-*d*<sub>6</sub>)

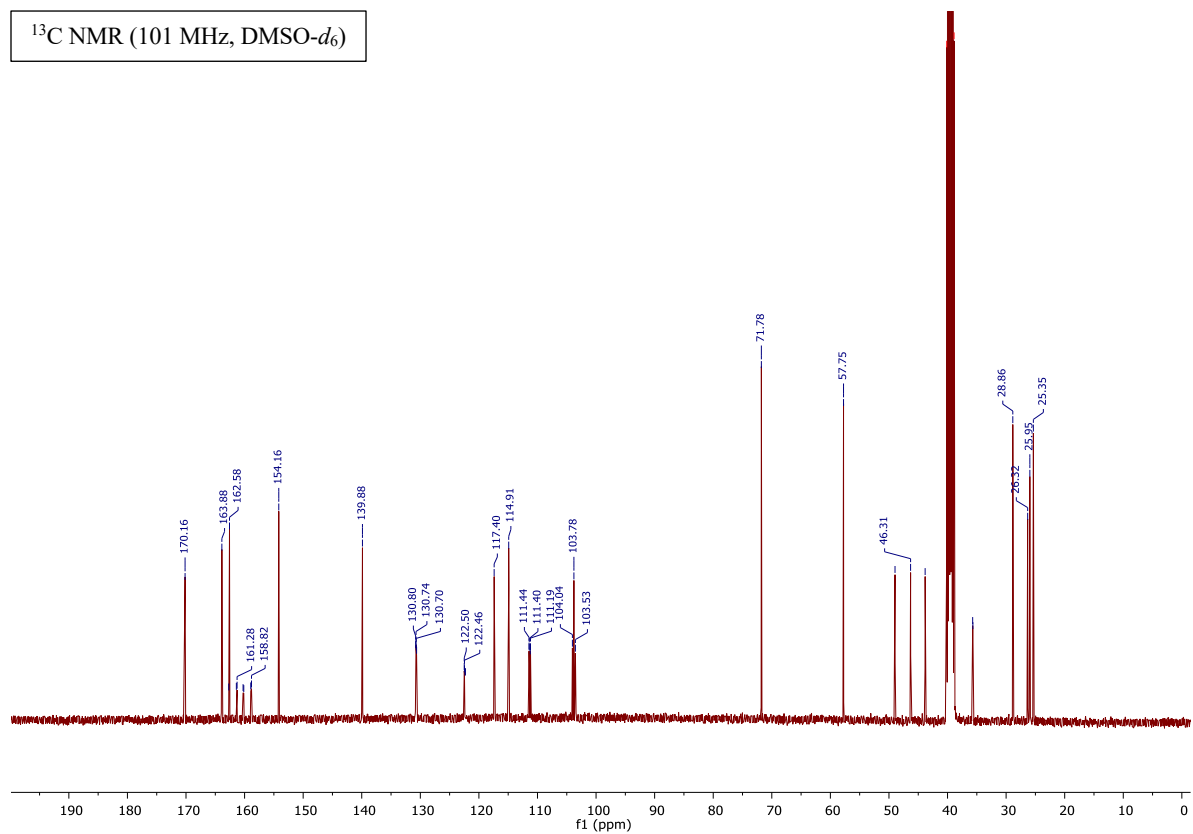

<sup>1</sup>H NMR (400 MHz, DMSO-*d*<sub>6</sub>)

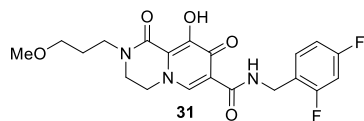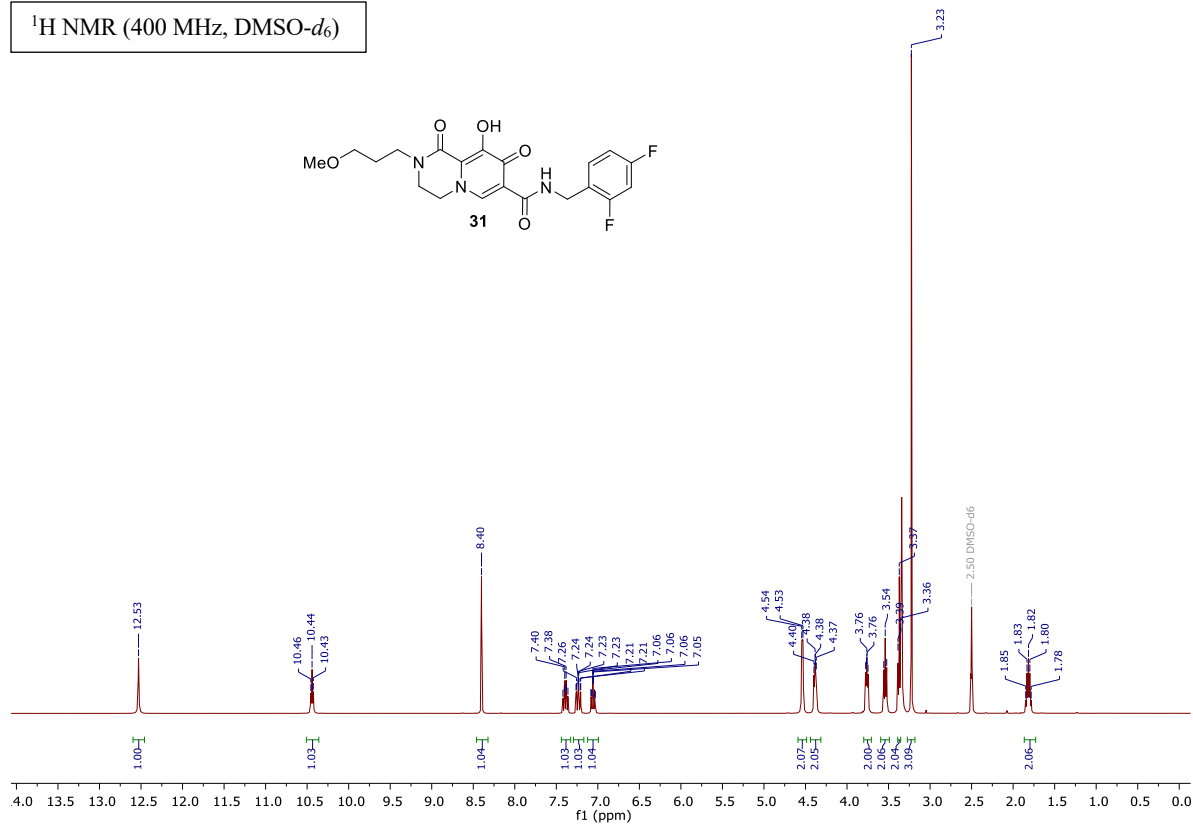

<sup>13</sup>C NMR (101 MHz, DMSO-*d*<sub>6</sub>)

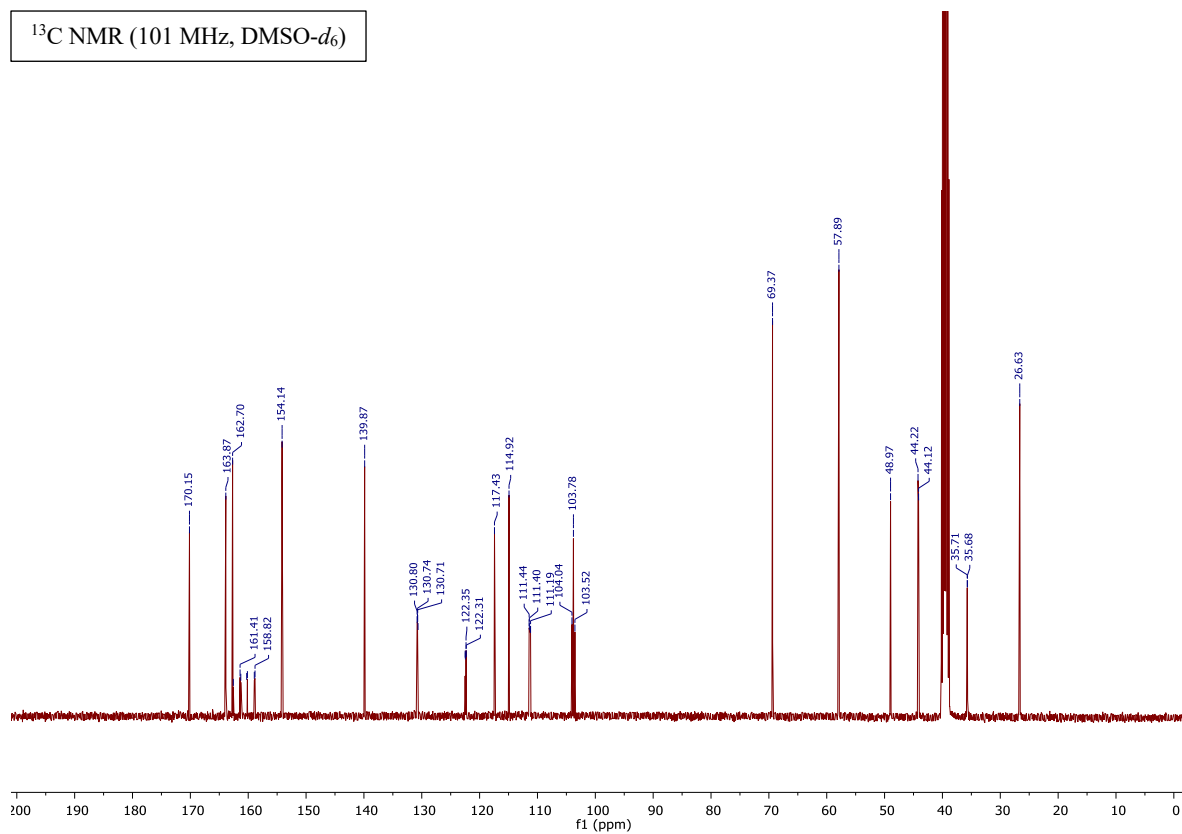

<sup>1</sup>H NMR (400 MHz, DMSO-*d*<sub>6</sub>)

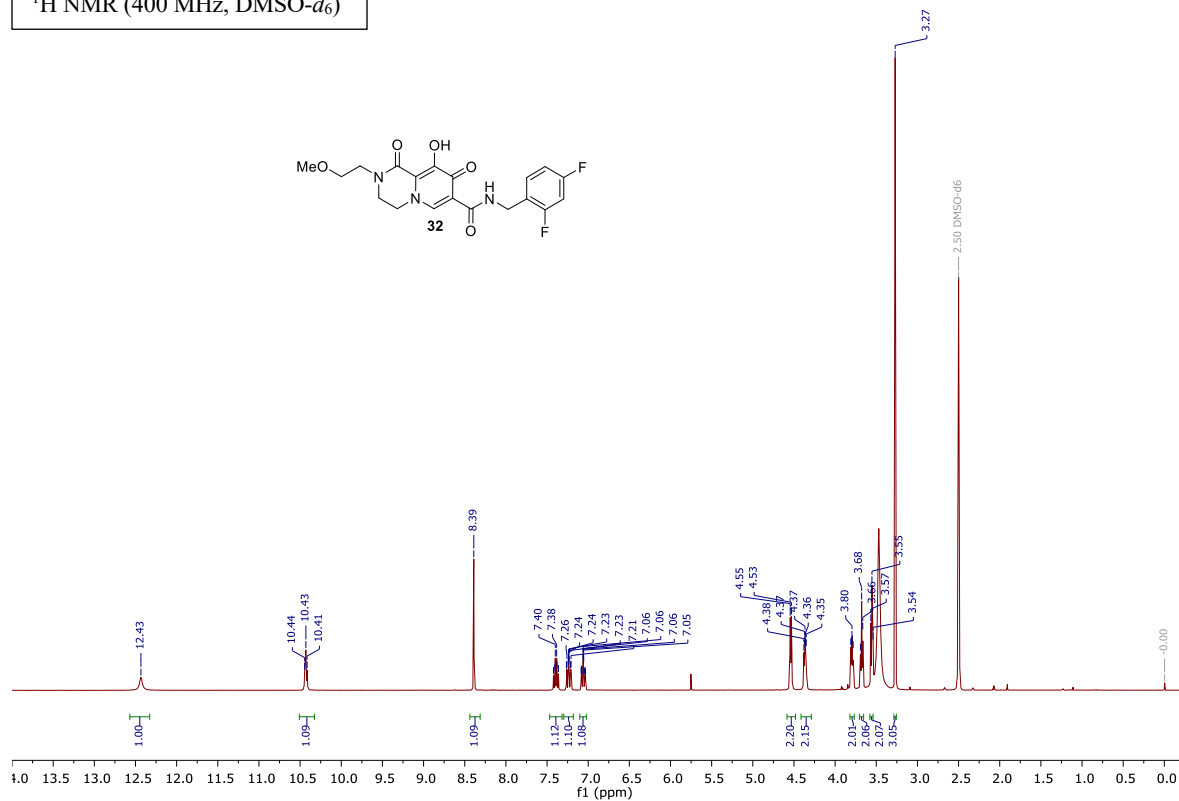

<sup>13</sup>C NMR (101 MHz, DMSO-*d*<sub>6</sub>)

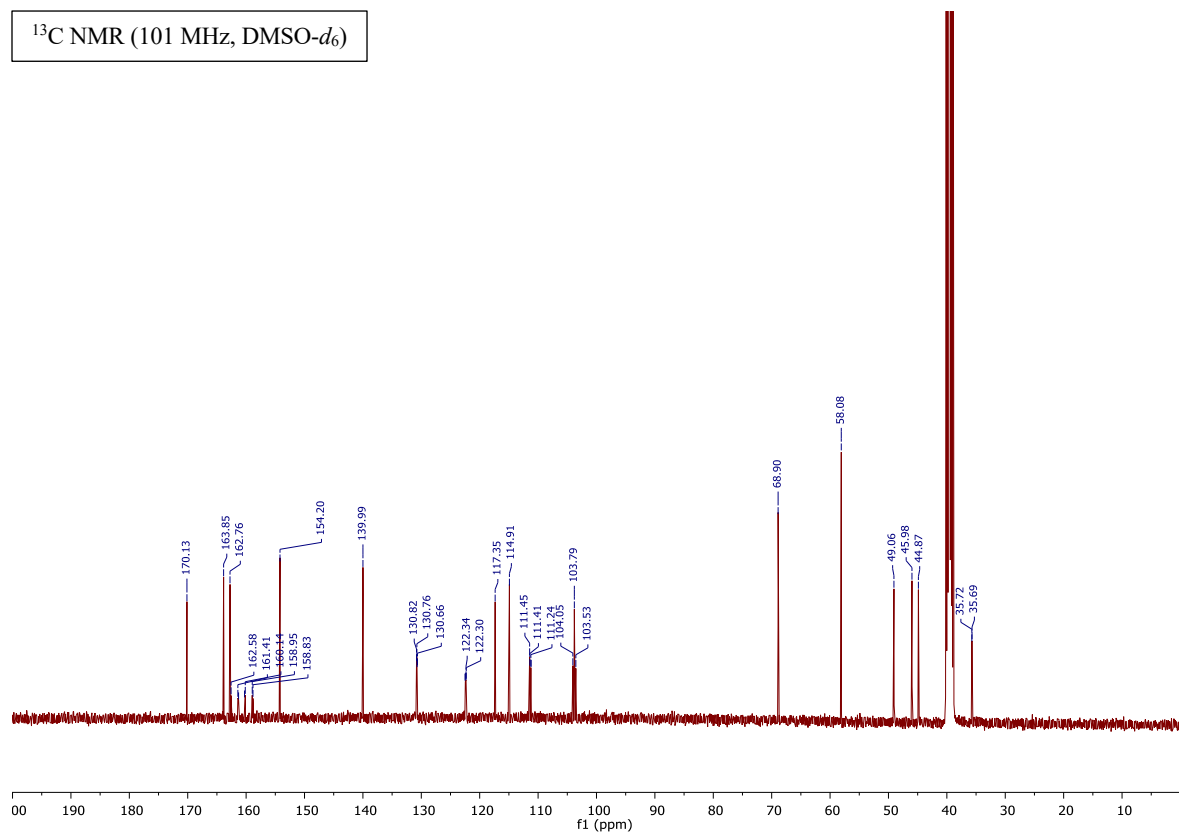

<sup>1</sup>H NMR (400 MHz, DMSO-*d*<sub>6</sub>)

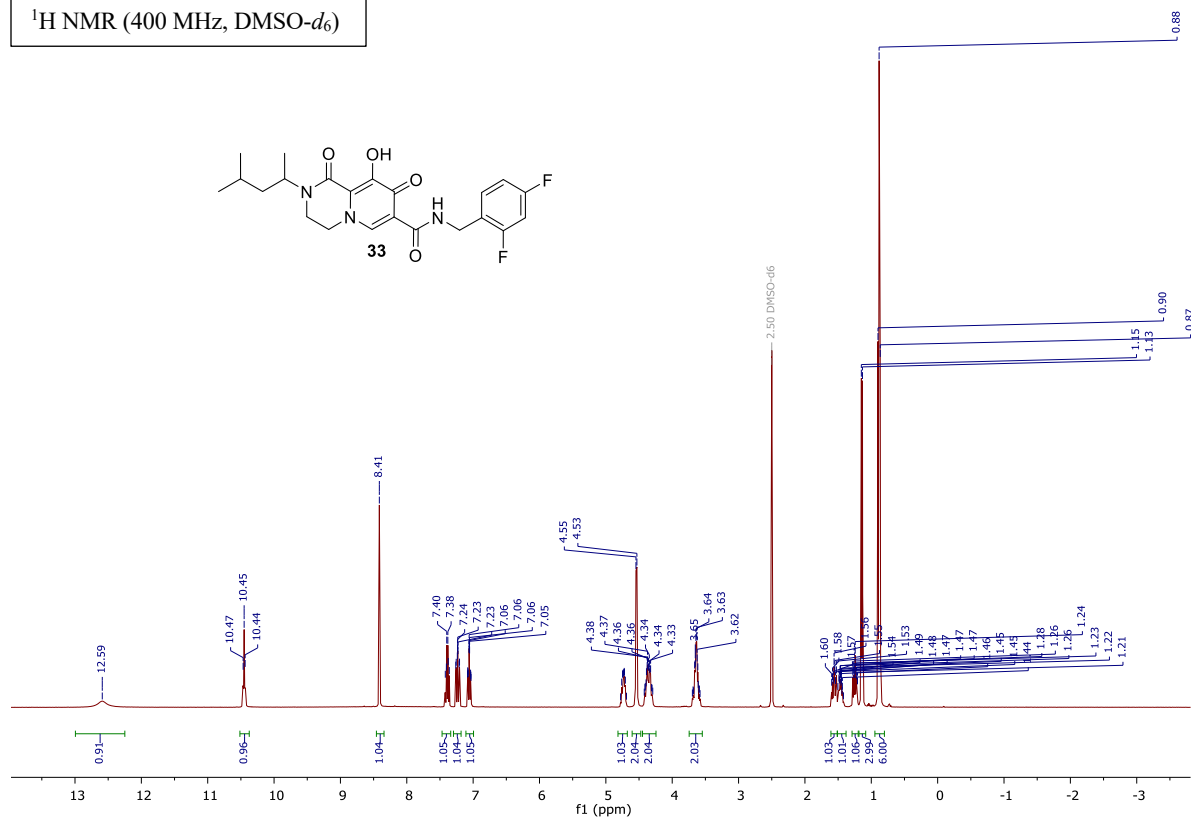

<sup>13</sup>C NMR (101 MHz, DMSO-*d*<sub>6</sub>)

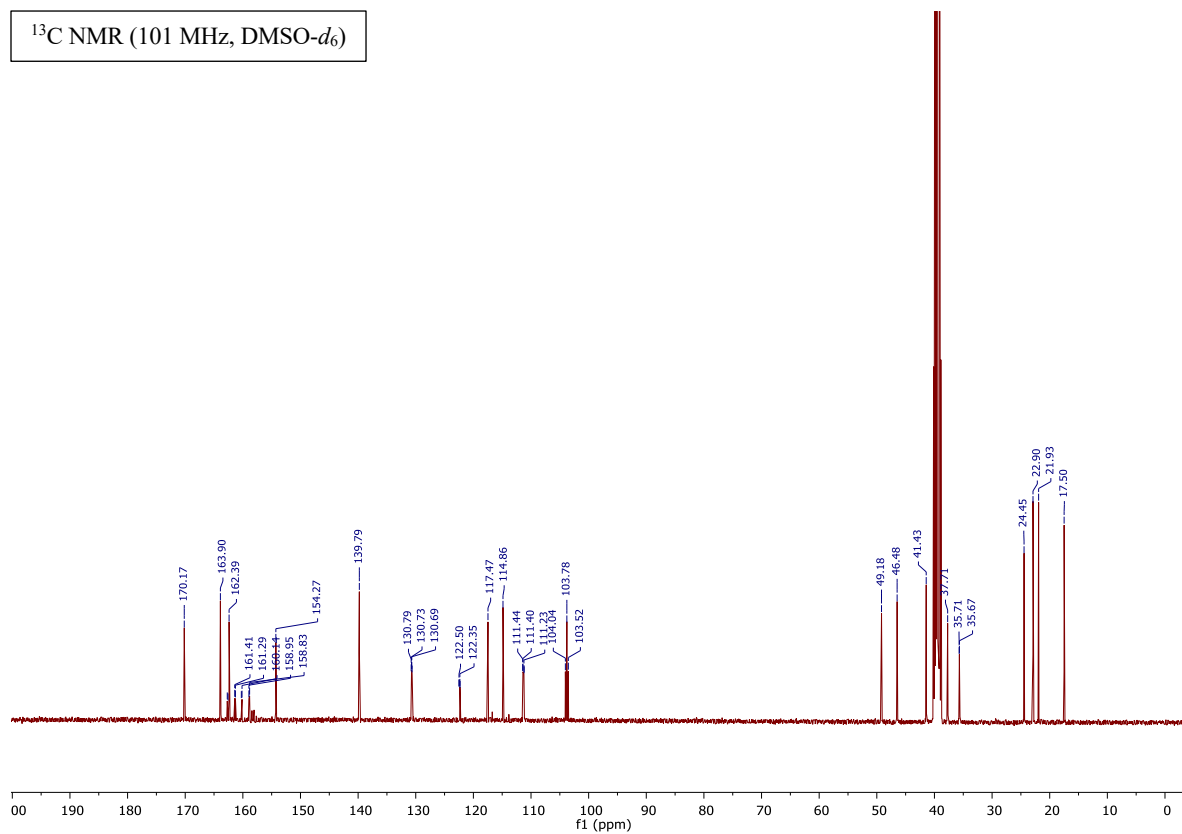

Supplement: s1 [file s1]
